# Supplementary material for: Fecal DNA Virome Is Associated with the Development of Colorectal Neoplasia in a Murine Model of Colorectal Cancer
Source: MDPI journal article supplement (doi:10.3390/pathogens11040457), 2022-04-11
Supplement: s1 [file s1]

>FP\_1\_4\_10\_S36\_clean\_1\_215953 flag=1 multi=3.6504 len=7270

ATCATGTTTCAGGCGGTACATGGACGGGGAACACATAGCGGATGATGAATCAGTGCTTGGCGTGATCAACTATG  
AATTGGCTTTTCAGGCGTTTCATATATAGCCCATATAAGCAATTTTACACTGATGCTTGATGAATCTCAGTATAT  
CCAAAATGAAACGGCTAAACGGTCAAATTCATACTTTCTTTAAAGCCCGAAAATGTGATCCTTCTATCCGGC  
ACACCTACATCCGGGAAATATGAAAAGCTATGGAGCCAGTGCCGGATGCTGGGCTGGAACATAAGCAAGGAAG  
CGTCTGGAATACCTACATTGAAACGGAATGGGTGGAAGATATGGACAGTGGCTATAAAAGACAGAATGTGAT  
CGGCTATAAGAATGTGGAACGATTGAAGCGCAAACTGGCGCAGCATGGGGCCGTGTTTCATGAAAACAGAAGAA  
GCCTTTGAACTTCCTGACCAGCAGGAAATAGCTGTGAGGGTTCAGTGTCCAAAAATTACAGGCGGTTTATGA  
AAAACAGCTATTTGCAGCTGGACGAAGAAACGGAACCTTGTGGGCGATAATGTTTTGACAAAGTTCCTGTATGC  
CCGCCAGCTGTGCGGCCAGTATTGCCCGGATAAGCTGGAAGCCGTGGCTGACCTGATAGCAAGCACGGATGAC  
CGCATTGTGATATTTTACAACCTTTACGGCTGAATACCTTGCACCTGGTACAGATCACTGACCAGCTGGGGCGGC  
CGCAGTCAGTAGTGAACGGCAAACAGAAACAGCTTTTGAACCTATGAAAATTGTGGTAATTCCGTTACGTTTCGT  
ACAGTATCAGGTGCGGGCGATGGGGCTGAATCTCCAGAAAGCCCATATCACTATATATTTTACGCTGCCGTTTC  
GGAAAGGGAAGCTGTGCCTTATGGGAACAGTCAAAGAAACGGACGCACAGGATCGGGCAAGGTGAGAAATGCC  
TATACTACTACCCTTTATGCAAGGGAAGCATTGAAGAAAAGAACCTGATCAACTTGCAGCTGGGGAAGGAATA  
CAATGAAAAGTTATTTGAAAAAGAATTTGTTTAGCTTCTGATCGGCTGCATTATCGGGATCCCCTTTTCGTT  
GTACGCCGTAAGCCATAGGGAGCCGGCCACAATCCCGGTGTATTATGATCCGGGGCTGTTTGAACAGTTCAGC  
GTGGAACCTGAACACTATGAACCAGCTGAACCAGCTGAACAGGCTGAAACAGTTGAAGCCTATGAAATGGCGC  
CGGATGACCTTGAATCTGAATATTACTATGACAGTCTGGAACCTGCTGGCGTTATGCGTGGAATCAGAAGCCGG  
GAATCAGGGGCTATATGGTAAAAAACTGGTGGCTGACGTGGTGTGTAACCGTGTGGACAGCCCGGACTATCCT  
GACAAATATCACGGATGTGATCATGCAGCAGAATCAATTCAGCGTAGTGCTGGACGGTAGGATCTGGACGGTGG  
AACCGTCAGAAGAAACCTTTGAAGCAATCCGGGAAGAACTGGAACAGCGCACGAACACGGAAATAATTTTCTT  
TACGTCAGAAGGATATTCCGCATATGGGGAACCGTGGGGAAAGATAGGGGATCACTATTTTCACTACAGGAAGG  
AAGTGAAAAAAAAGTGGTTATTGATATTTTTTAACACTGATAAAAAGTACAACGTGATCTATGCGGATCCGCC  
GTGGCGGTATGGTGATCGGAAGTGCAACGGTGCCTGTGAGTTCCTACTACAACACAATGACCTTGCAGGAAATA  
AAAGATCTGCCTGTAGCCCGGTTATGTGAAAAAGATTGTGTCTTTTCTCTATGGGCTACATATCCAATGTTAA  
GCGAAGCCCTACAGGTCATTGAAGCATGGGGTTTCAAGTATAAAAAGCATAGGTTTTCAGTGGCTAAAGCTGAA  
CCGTTCCGGGAAAGGTTATTTTTTTCGGTCTGGGAAGATGGACACGGGGAATAACAGAGCCTTGTCTGTAGCC  
GTCAAAGGAAAAACCGTCAAGGCAAGATAACAGCATTTCACAGCTGATTGAATGGCCCATTTGGCGCACATTCTG  
AAAAGCCGCTGTACACCGGAAAAAAATCAAGGCTTTGCTGGGGGGGGGATTGTGTGAGAGGAATAGAACTT  
TTTGGCCGACTACTGCCGAAGGTGGGATTGCTGGGGCAATGAAGTTTAGGAATGAAAGAAGAAACCGCCAG  
AAAAAGGCGCAGGAAAAGGAAGGTGACAAAGAAATGAAAGTTGTGTATGTGTGTTCTCCATACAGGGGAACGC  
CGGAAGAAGTAAAGCGTAATTTTGATTATGCGGTGGAACGACAAAAGAAGTCTGATGGCCGGCTACTACCC  
TATCACGCCGCACCTTGTATATCACGGCTTGTCTGGACGATACGAAGCCGGATGAACGTATGCTTGGAAACAGGC  
GCAGCGTTGGCATTACTGGAAAGGTGTGATGCTGTGATGATTGGCAAGCGTTACGGAATCAGTGAAGGAATGG  
CGGCTGAAATCACAAGGCTACAGATATGGGGATCCCGGTATTCTCCCATTACAGAAAGGACACTGTTTCAGGAA  
ACTGACGATCCAGTGTGATATGTCAGGCAGCTTTCCAAAGACAACGGTATTTGTGGATAATGAAGCAGTTGAC  
CGCATTGAAGAAATTTCTTTTACACATGAAGCTGGCTGGGATCCCATGCTGACTATGAAACGGACACCGAAGG  
AAGGGGAAGCAGATGGCACAGGAAAAGAACTTTGAAAACAAGGTCAAGGCTTATTTGAAAGAATCCGGCTGCT  
GGTTCCTGAAATACTGGGGCGGTGGCGGTTATACAAAATCCGGGGTTCTCTGATCTGCTGGTTTGTGCAAAGG  
GCGGTTTCATGGGGGTGGAACAAAGGCCCGAACGGCACGCCCACGGATCTACAGATTTACAACCTTGCAGAAC  
ATTGACAGGGCGGGCGGTCTTGCAGTCTGCTTTATCCGAAAGATTTTGATATGTTCAAACGTTTGGTAGAGG  
ATCCAGACAATAAGAACTGTATGAAGTCTGAAATCGAAGTGGAACACTTTGAAAATATAATCAAAGAAAA  
GGAGAATTGAACAATGGCAAAGAAAACCTGAAACAACACAGGAACAGGCGGCAAAGCAGACGGAAGAAAAGCCC  
GCTGTAAATTATGCTGACATTATCAGAGATTCCCTTATGAAAACAAAGCGTGAGGGCATCGTTGATCTTCTGG  
ACTACATGAATGAAATCGGCTTTCTGGAAGCACCTTGTAGCGGTGGAATCATCTTGCGAAGAAAGGCGGGCT  
TGCTGAACATTCCGTGAACGTCCTGACCATAGCGGAAAAAATTTGGTGTTGCGCTGCTGGGCGGCGCAAGATAC  
AACGAAGTTCAGGACAGCGTTGTTATTGCCCGCCTGCTTCACGATCTGGGGAAATGCGGCGATTATGAAAAGC  
CTATGTATGTTGAAAGCATCCTGAAATCTGGGAAGCAGTCTGACGCAAAGCCCTACAAGCGGAATCCTGAACT  
GTCTGCCGTTCCCCACGCTGTACGGTCTATCAAGCTGGCCACGCTGTTTATTGACCTGACGGAAGCCGAAGAA  
TGGGCGATCCTTTGCCACGATGGGCTGTACGATTTTATGAAGTATGACCTGAAAGGTAAAGAAACATGGTTAC  
AGATGATCATTCTACTGGGCTGATATGTGGGCCAGCCACATTATTGAAGGGGTACAGATGAATAATGATGGGA  
ACTATGTTCTGTGATGATGAAACACCATGTGGCTATTGTGTGCGAATTGACAAAGAATGTCTTGAAGGGGTA  
AATGTGCGCCACGGAAGGAGGCGGCGGATGCAAGTCTGAAATCTGATGAAAAGTTATTAAATCCGGC  
TGGTGAATATGCTGTAAAGTTTGCAGAAAATCATGGAATCAGCGTTGATGAAGCCATGCGGGAACCGATGGTA  
AAAGCCCGGTTTGCAGCATATGCGGCCGGTGGAATTTAAGAAAGTGAGGTATGACAAGATGGAGCGTGATTAT  
TTAGAATGGATCAACCGGACATATAGAAAGCTGGTTGACGATCAGGAAATCCCTAAAATGGAATTGAAAACGC  
CGGACGGCGGCAAAATTTCCGTTTACAGGGTGGGTGATGTTATCCGCTGTGACATTAAGCGGGCAGAACTAA

AAGAAAGTGAGGTATGACAAGATGGCACAGAAAATTTTAATCATGGGGGACTCAGGAACCGGGAAAAGCACCA  
GTTTAAGGAACCTTGATCCCGAAATCACGGCGGTGGTCAATCCCGTGGGGAAACCGTTACCGTTCAAGTCCAA  
CAATGGGAAGTTCACCATGCTGAACAATGAAACGAAGTCCAGCAATATCATGGCATGGATGAAAGGTGAGGCG  
AAAGCCGGGAAGAAGATCCTGATCGTGGATGACTTCCAGTATTTGCTTTCCATTCCCTATATGAACCGCATA  
ATGAAGGGGGCTGGGATAAATGGAATGATTTTGGTGACGATTATTTCAAGCTGATTGACATTTGTGCTGACCT  
TCCGGCTGACGTGCGTGTGTATTATCTCTCTCATTGTGAAACGCTGGAAAATGGGATCACTACCATTAAAGCTG  
ATCGGAAAGCTGTTAAGGGAGAAAATCACCATTGAAGGGCTGTTCACTATCGTTTGGAGAACGTCCGTTATTG  
ACCAGAAGTATTTCTTCTGACGCAGAACAGCGGCAAAGATACCGTAAAAAGCCCTATGGGTATGTTTTCAGA  
ATATGCGGTTGAAAATGACCTTGCCCTATATTGATGATAAGGTATGTAACCTATTATGAGATAGGCAACTACAAG  
AGTGATGCAGAAATGGCGGCACGGGATCAGGAAGTGGCCGCGGTATTGAAAAGCCGATCCGAAAGGACGCA  
GGGCAAGGGGTACATCCGCAGCACAGAAGGGCGAACGTAAGACACGGGCGCAGGTGGAAGCTGAAAACAATGA  
AAAGATCGGTGAGTAGATGGAACAGGTTGACAAGGCTGTTTCGGAAGCTGCCGGGGATCGTGAAGAAATTCG  
TTTGAAGAAGCCGCTGCTGCCGCCGATACCGTACCGAAGCCGATCTGAAAAGCCGCCCGCCGTACACGCC  
GGGAACGTGAGGAAGAAGCTGATCAGAACAAAGCTACAGAAGATATGTATTTTTTACCATGCGGAATCAGATAG  
TTTCTGGATGCTGAAAAGGGTGAAGTATTCCTAACAATATTGATGCACAGTGTCTGTTCAGGTTACAAAA  
GAAGAATATGAAGCAAAACGCTGTAATATCCCGATGGACAGGACGAAGAACCGCTTCCCATGAATCCCCCTG  
TAGAGGGTGACAGAAAGCCCCGTGAACGCAAGACAAGGGATATTCAGCCGGAAGGTCAGGCAGAACAGCAGGA  
AACGCCGCAGGAAGCCGTTTCAAGGAGCCTGAACAGGGTGGATCTGCAAGGTCACGCCGTACAAGGCGCACAAAG  
GGGTAAATGTGGAGCAGAAAAGTAAAATGTGATAAATGCGGAATGAAGATCTTTATCAAGCTGAAAAGCAACA  
GAAGGGCGATCTGGAATACCAGTATTTTCACTGTAAAGCACTGTAACACTTCTTATGTGGTATCGGCAACGGAT  
CCGCCCTTGCGCCGGGAAAATGCAGAGGTATGAAGATCTTGTGAAACAGGCTAACGCACTGGCGCAACAGGCGC  
AGGAACTTTTACAGATAAATGTGAAGCGGTGCAGGGAAAATCATGGATCAGCATCCGCTTGAAGTGTAGGTAAA  
AAATTTTAAATTTTATGGCCCCATGAAGGGCAGAAAGGATGTTATAATTATGGCAGTAGATTTTTTACGATTAG  
ACAAGGCAGTTGATCAGGAACAGTTAAGGAAGGACGTTGAAGAAGCGAAAAACAACAGCGGCGATATTTCCCAA  
AGGAACCTATATTGTGGGGATCGACAAGATGGAGATCCGGGCCACGAAGGATGGCCGGCCTATGTTCTTCATT  
CAGTGCCGTGTCAAAGAAGGGGAATACAAGAATAAGTGTGTATTTATGAACCGGGTTATTTACGGGACAAAAG  
ATGACGGCAGCATGATCCAGTCTGTTATTACCTGCTTGACAAGCTGGAACCGGAAACCATCCCGGAGTTCAA  
CGGGTATCAGGATTTTGTGGATGTGGTGGCTGACATTTACGAAGAAATTCAGGGCAAGGTTGAATGTGAAATT  
GACTATGACAAGGACGCTTTCAACAGTGTGAGCATAAAGGAAGTATTTGACGTATAAAATTTTTTACCCTAAA  
AGTTAAGACTACTTAACTTCAAATGAAATCAGAGGGCCGCTGTTAAAAGATTCTTAACAGCGGCCTGATGGAC  
AAAGAAAGGGTGATCAAGATTTTATTTTATGACTTTGAAGTTTTCAAATATGACTGGCTGGTGTGGTGATTG  
ACAGTGACACGCACAAGGAACACGTCATAATAAATGACCGTGACCAGTTAGAACGGCTATATGAAGCAAATAA  
ATACAACATATGGGTGGGGTACAATTCCCGCCACTATGATCAATATATCCTGAAAGGGATCCTTTGTGGTTTT  
GATCCAAAAGAAATAAATGATTTTATTATTGTTTCAAGCATATGGACGGCTGGCAGTTTTCTGACCAGCTGCGGA  
AGATCCCCCTGAATAACTATGACGTGATGCCGAACCCGCCCGTAGGATTGAAAACACTGGAAGGGTTTTTAGG  
ATCCGACATAAGGGAAACGGAAGTTCCTTTTGACATAAACCGGAAGCTGACACGGAAAGAAATTGAACAGACC  
GTGTTCTATTGCCGCCATGACGTAGAGGAAACCATAAAAGTGTTCATTGAAAAGATAGATGATTTTCATGCTA  
TGTATGGGATTGTCAAGGCTTTCCCGGACATGGTGAACCTGTCAAATATAGGCGATACGGAAGCCCGGATCAC  
TTCTAAAGTGCTGGGGTGTGTGAGGAAGATTTTCAAGGATGAATTTGATTACTTCTTTCTGCCCTGCATACAG  
CTGAAAAAATATAAAGCGGTTTCAAGGACTGGTTTGAAGAAAAGAAACGGGAAGCCCTGTCAAACAATATTCAAG  
GGAAAAACGATGCCGCAAAAAAGGCATGGTATAAAGCGCAATCTTTTGAAATGATTGTAGCCGGTGTTCGCA  
TGTTTTTGGTTTTTGGTGGGCTGCACGGTGCGCCTGATAAGCCTATACACAAGAAGGGCCTATTGCTTCATGTT  
GATGTAGGCAGCTACTACCTTCTTTACTGCTGGCGTGGAAC

>MA\_1\_1\_23\_S45\_clean\_1\_24213 flag=1 multi=4.0000 len=6438

GCGTATTTAATTGCAGATGTTTTCCAACGCCAATTTTTATCGAGAAAGACGATGAAGAAAAAATTTAGAGACG  
GAAAAATCTTCACAACCGAAAAGATAAGCCCTCAGAAAGAAAAAACACCTGAGGGCTATTTGTTGTGTAAGTC  
AGTACCGATTAGCCGTATCGGAACATTTGAATATTCCGGAGTGGAAGCTGGTTTGTCAAACGTTTCATCAGTG  
ATGTTATCCAGAAAAGAAGATGAATTGTTTAACTCTAAAACAGTGACCTCTTTTGAAAGGGAACCGGTTGTAA  
TCAGTCACGCCCGCTTCGCCGATCCTGACAATTGGAAGACATTGCTGTGCGGACAGTTCAAACGTCGCCCG  
TGGAGACGGAGAAAACAGCAGTTTCTTTTAGCCGATCTACTGCTGACTGACAGAAATGCAATTGACGCTGTG  
GAATCCGGACAGCTCAAAGAGGTCTCTTGCGGTTATGACGCAGATACAGAAGAAACCGATGACGGAATTAATC  
AAGTTGGAATTGTGGGAAACACGTTGCTTTGGTAGTTAATGCCCGGTGTTGCGGCTGCAGAATTAGGAGATGG  
AAATATGAAGCCAAGCATTAATAATCGTTTGCGGAAATTTTCCGTGACGGCGATGAAGATGGATTCAACGAA  
GAGTTGGACGGCATGACGTTAGCCGATTAGAGGCTCAGCCGCCCTCAGGAGCCGACCCCGCCGGCTGACTCCCT  
CTTTGGAAGAAAGATTGACCAAACCTGGAGGTGACAGTCAATGCTCTCTTAGAGGCCCAACAGGCTAAAAACAGC  
TGATGCAGAAGAGACTGCCGCAGAAGCCGATGTACCAACTCTGTTGACAACGAAGATGAAATTGTTGAGGAC  
GAAACAGCCAAACAGGTGCTTGCTGACGCTGAAACATTGTGCCCGGGCATGAAAAAACCCGTAGGCGACTCAA  
AGGACGGCAAATTTCTCAGAGGCATGATTGAAAGGGTCATGCGCACCGCTCTCAAAGGCTCAGGCTGTAAACA

GTTCGGAGATTCTGCGGAACTCGAAGGCAAAGCGCTGGACATTGCTTTTAAAGCCGCCCTTGAACATAACAAA  
GCAGGAAAGAATCCTAAAGCTCGTAGCTTCGGCGACAGCTCGGAAACGCCTGAAGTCAACTCAATTGAATCAA  
TTCAGAAACTTTTTTAACGACTATTGGGAGAAAAATAATGTCTTCTTTTATTGGTACATCAATGTCCCGT  
GGTTTTGCCGGTGAAATTACACGAGGAACTTTGCGACTACACCACAGAGGTCAAAGAAAACGATAGCACAACTC  
CGGTTGGTGCTCCCGGCTTGCTGTTTTCTTTGACTTCGGCCGGAAGGCAACAGTAGCAACTGACGCCACAAA  
AGTTTATGGCTTTTCAGTGCGTGATTACCGCCAAGTAGGCCCTGACGGAAGAGTCTGGCCTGCAGATCGTTTT  
GTTTTAATCCTGCGTAGAGGCTACATCGCTGTCCTTGCTGACGGCACCCCTGCTGTGCGTGGCGAAGTCTACA  
TCGGGACAAACGGAAGTCAACGCTACGAAAGGCGCTGGTGCTGTAGCAATCCCGAATTGCCAATTTATGGG  
CACTAAGGATGCGGATGGCATTGTTGAAATCGCATTTAACATTTAAAGGAATGAAAAATGAGCTTGAAATTTG  
TTGACTCTGAATCAATCTCTCCACAGGTGCATTTCTGGTCGGTGAAGTGAACGCCTGGATGCAAAAATCTA  
TGAGCCGATTGTGATTTCACTTACGGTCTGACATTGATTTAAGAGAGGATGTCAACATCGCCGATGAAGTC  
TCCTCCTTCTGCTCTCTGACTACAAAGGAGGATTTCGGCGGCACATCCGTAGGAAAGAAGTCTTCATTAAGG  
GTGCTGACTCTACTCCGGCACGTGTTAGCGTTGGCATGAAAAAGATCGCCACTCCGTTGACCCTTTGGGGTAT  
GGAAGTGTCTACACCATCTTCGAATTAAGAAAGCCATGCAGGCAGGCCGTCCGATTGACGCACAGAAACAC  
TCTGCAATGCGCTTGAAGCACCGCTAGACATTGACACTCAGGTCTATATCGGTGATACCGAAGTTGGAGTTA  
AGGGCCTTTTGAAGTCTGATCAAGTCACTAGCGAAAACGTTGGAAGTGGACAGATTCAACTGATGTTAAGAC  
AGTTATCGGCTACTTCAATAACATCCTTGAGAAGGCATGGAAGGCCACCGAATACAACAGAATTCTCGCAAT  
CTGCTTGTACCACCGGCAATTTTCGGCAAATTAGTAAGCACTCAGCTTCCTAACACCAAGATGAACCTTTTGA  
GATACGTTGAAACAAACAACCTCTCTACTGCAACCGGTGGTACTTTTAACCATCCGTCCGGTTTCGTTGGCTGGC  
AGACAACACTCTGTTTTAGTGCTCCTCGCATCGTGGCTTACACCAAAGATGTGATGCTGTGCGCTTCCCGCTC  
GTTCCGATCGCTTCTTTACCGGTTTCAGTACCGCAACTACGAACAGGCGGTGCCTTATTATGCGGCTCTTGGCG  
GAGTTGAGTTTCGTTTCGTCCGGAAATGGTGTACTACGCAGATTTAGCCGCTGCCTCTAGTTAAGGAAAAGGGG  
CTGAGATGAAAAAATCACTGTAATCAGTCCCGTGATTCTCAACACATCCGGGGCGAGCTATCAGTTTCGCTCC  
GAAAGTGGAGTATGAGGTAGCTGACGACATTGCGAATCATCCCTATCTGCGTGGTTTTATTTCCACATGTATA  
GACATTTCAAAACCCAAAGAGGAGCCGGCTCCCAAGCGGGCCCCCTCAACCAGACGGGGAGTAAAAAATGGAC  
GTACTAACCATTGAGCAATTTTCGGGCGAATTTCCCCGAATTCATTGAGGACAATTTCCCTGATTTCAGCGGTCA  
AAATTCGTTTTGAGTTTGGCCGCTAAATTTTTCTCAGAGGAAACATGGGCAGACCCCCGAAATTAGAAACCATGT  
GATCGGCCTGTATGCAGCTCATTTTCTGAAGCTTGAGGGTTCGGCAGCAGAGGGTGGCCATGGCGGAGACAAC  
TCAGCTCTTGACAAGTGTCTCTATGTCTGTTGACGGTGCCAGTGTGAGCTATGACACCAACACTTCCGCAG  
AAGATGGTGCGGGAACCTTGGAATTTGACCGCATAACGGCAGAGAGCTGTGGCAGTTAATGCAGTTGTTTCGGTGC  
AGGAGCCAGACAGTTATGATGAAATCAATTAACGTGTCTATCGTGCGCCACGACAAGGAGTTAAACGCTGCCT  
TGAAAGAGGCTTCAAAAAACCGCTATCTACGTTGGCATCGCCGAGGGCTCAAAAAAGGATAAGCGTCAGGACAA  
AGCCCCTGACAATCACTTGCTAGGCTTTGTTTCATGAAAAAGGTTCTCCGGCAAATAACATCCCTCCTCGTCCT  
TTTCTCGTTCCGGGGATTGAAAAATCATCTCAGATGATTATCTCCGGATTAAACGTGCGATGAACGCTGCCC  
TTAATGGGGATGAGCAAAAATGCTCTGAGGCACTGGAGCGTACGGCTATTTCAGTCTGCATCGGCTGTTAAAGA  
GTACATGCAGACAGCTGAATTCGCTCCTCTCAAACCTCAGACAATTGCGCACCGCAACCGCTCCAGAATGACA  
GCAGGCAAGCGCAAAAACGAGAACCCTCGGAATCAACATAAAACCGTTAATTAACACGGGCCAGTTACGTAACG  
CTATCGATGGCGTGGTGGTCTGAGGGAATAAATGGCGACATTAGATGTAGAACGGGTTATCCGTTACCTTT  
TTTTACTTCACCTGCAAGCTCGTAGCGGTAAAGGAGTCTGCGGACGCCTACGGAAATCCGGTATGGACTGAA  
ACGGCTTCGGCTGAAGTTTCAGGCTGTAGTCACCTCCGATTTGCGAACCATGCAGAGAATTCCTGAAGCTCTCC  
GGCACACAGGTTTCGATTTTAGTCAGAGTCATGATTGCCGATATTCCTGAAGGCTTTACCGGCACAGGTTTTGA  
TGAGATTCATTGGAGAGGCCGGCGTTTTACTGTAACCGACTGCGCAGATTATTCTCAATTCGGAAAAGGATTT  
TTGCGCATGATTTGCGCCCCATGAGGTCGACAAATGACCGTGTGTTGATGACAGCAGAGGAGCAAATGTTTT  
GCGACCAACATCTTCGATAACGAATCGAATTTCTTGATCCGTTGAGGATTTGGGTCTCAAAAATTTTAGGA  
TTCCCTCCTGAAATTGTCCGAGCCAGCTGGCTACAAAAACCGGAATCAACCAAGCATTAACAAAAATTTGGT  
GCGCCCTAGCCGTTAAAGGAGCTCAGAGCACTCCGATTTATCAATTCGGCAAGAAAGGCCGTGTTGACGATCC  
CGAAAGCGGTGACACAACTCAGGTATCTCACGATGACTATCAAGTTGTTATCAGTTTTTATGGACCGTCTGCA  
ATGTTTAACGCTATGAGGTTTCGGGACGGAGCACAGCTGCTGCAAAACAGAAGAAATCTGGAGAGTTACGGCC  
TAACCTCATCAGACTCGACCCGACAGATTGAGGCTTCCTGATTTTGCAGGAGAACAGTGGATCGACAGATA  
TGACGTGGAATTCATGTGCGCAGAAAAGTTTCAAGAACTTATGGAGTCCGCACTGTTGTGAGTGCTGATTT  
GACATTTTTTTTTAGAAAGAGGTAAAGTATGAGCGTATCACCTAGGCTTCCTGTCTCAGAGGTTGTAAACGTCA  
CAATCGAGATGGCACCGGTAGCAGCCGCACTCCGAAATTTTCGGAGCGATGCTGGTTTTAGGAACGAGCGATGT  
TATTGACGTTGACGAACGTATCCGCACCTATTTCAGGTGTTGAAGCTATTGCCGCCGATTTTCGGTACGAACCTCG  
CCGGAATATTCCGCTGCGAGTTACGTTTTTCGGTCAAAGTCCCTCACCTTCCTGCTTAATGTTGGGCGTTGGG  
CAAAAACGGCAACATCCGGACTTCTCAGAGGGAGAATGTTAGCTGTGAGTGAACAGCAGATTAGCGACTTTGA  
AAAAATCACAGCCGGCGGTTCACTCTCAAAATTGACGGCGCCTCCGTAACACTTGAATCTGTTGATTTGAGT  
GCAGAAAGCAATTTGAACGGCGTGGCTACTCAGATCACTAATGCTTTATCTTCTAAGGGCACTTGCCCTCTGGG  
ACGGAAGTAGATTTGTCATTAAATCGGCCTCAACTGGAACAACCTCATCGGTCTCTGACGTATCAAAAACCGA

TTTATCTACCTTGTTGGGTTTAGATGAAGGAACTTCGAGGGTATCCGGTGCACCTGCAGAATCATTAGTTGAC  
GCTGTAACAGATTGCCTTGACTTTACAACTGGTACGGCCTTTTTTGTGGCTCCGGATGGACAGAAGAAGATG  
CATTGAGTGTTTTCCGAAGTATTAATGCAGCCAGCCCGTCACGAATCGTTGCATGGACATCTGAAGATACCGG  
CGAGATGGATTCAACTGATTCCACTTCCCTCGGCGCAAAATTTAAAGCTCGTGGCTACAACCGCACCTTCGAA  
GTATTTTCAAGCACAAAGCGACACTGCTTCTGCATCCGTTTTAGGACGCATGAGCACTATCAATTTGAAGGCT  
CAAATACAACCTCTGACACTGAAATTTAAACAGTTGCCGGGAGTGCCTGCAGAAAATCTCAGAACCTCCCAGTC  
GTTAGCGTTGCGCTCTAAAAACGTGAATGTTTTTGGCGCATTCCAAACGATACTTCGATTTTTTAAGAAGGC  
GTGATGTCCGGAGGCTGGTTTATTGATGAAACCCACGGCCTTGATTGGATGCAGAACAGAGTTGAGACAGATT  
TGTGGAATTTGCTGTACACGAGCAATACAAAATCGGTGAGGACGAAACAGGTATGACCGCGATTCTAGCGAC  
AATAAACAAATCGCTGGATGCAGGCGTCAGAAACGGATTAATTGCTCCGGGAGTTTGGAACGGTGACTCCTTC  
GGTTCACTTGAAAAAGGAGACACTCTGACAACCGGCTACTACGTTTTATATCCAGCCGTTGGAAGAACAAGCGC  
AGAGCGACAGAGAAGCCCGCAAAGCACCGCCGATCAAGATTGCTATCAAGCTTAAGGGAGCAGTTCAATTCAT  
CGACTGCACTCTCACAATTAACCGCTAGGAGAAATTTAAATGGCAACTTATTCTTTTATGGATGTAACCGCCA  
CTCTGGCGGGACCTACAGGTTTTATTGATCTGGGTTATGGTGCTGCTAATTCAAAAGAGGGAATTTCTTTTGA  
GTACAGTCAGCCTCGCAACAACAGAACTGTGGGGGCTGACGGTGAAGTCATGCACTCTCTGAGAGCAGATAAA  
AGCGGTTCAATTACCGTACGTCTTTTGTATACATCACCGGTTAATGCAAACTCAAAATCATGTTTAACGCCC  
AGTCTCTGAGTTCA

>MA\_1\_4\_14\_S91\_clean\_1\_272093 flag=1 multi=4.0000 len=5607

TTCCGTCAACTCGTCGTGTCAGTCAACCGCTCCAACGTCTCAAAGAGATAATTGTTGAGGTCAGTCAGAGTGTTT  
CGCATCACGCATCCCTCCGGCTGAGCAGCTGGTGGGTGCCGTCCCGCATAGCCTTTTCTTCGTCCGACATCTC  
ATAGCCCAGGGAGACCAGGAAGTTGTAGAGACGGTCAAGCTCACTGTTCCGGCTCATGCACGATCTCGTACTCC  
CGCTTGTGCGTGTTCCACCTCTCGTCCCAGTAGCCGTTATCATCCGCATCAACAGAGGGCATAGGCGCAGACCA  
GCAGGGCGTACTCCGGGTGCTCGTCGGCGCACTCTTCCACCATGGCCGTGAAAGCGGGGTAGTCCGTGTTGTC  
GTCAATGCCCAAATCCAGGAGTTCCCCAGTGAGCTCAGCATTGATTTTCATCCCGGCCATATTCGCCGTCTCCG  
ACGATAGCACCGACCGCATACTTGCAAATCTCAACCAAGTGCTTTTTTGGCGGGCGGAGAAATCAGAAACGAACT  
CAACCCGCAGGGAGTAGTGCCGCTCGGTGATTTCCCTCAGCTCGGCCTTGACGCGGTTCTTGGCCCCGGTTCGTT  
CTCTTTGCGCTGGCGCTCCTCCTCGGTTTCGACCCGCTCCTGCCGGTCTTTGTAGAGGTCGATTCCGTTGGTG  
CCAACGAGGTAGTAGTATCTGACCTCGCCGGCGTCTCGGGCCTTTCCACCATCTTGTCTTTGGGCGACCAAA  
TGCCGTAGTTGGTGACATAATCCATGGGAACCGCAGTAGAGCCAACGCAGTCCCGCTTTTCGATTTTGAGGGC  
AAACGCCCTCCAAGTCGGTTTCCCACTGGGCCATCCGGCGCAGGTTTTTCTCCTCCTCAATAGCCTTTTTTCAGA  
ACGTCCCTGAAATTGGCGGTGCCGATGGCATCCAGGGCCTTGTTCTTCAGCTCGGGCGTCTCGATCTTCTCCA  
GCTGCGCATAGTCTTGAGGGTGGCACCCCGGGCCTCGGACTTCTTGAACCTTGTCGCGCATCCAGCTCCAGGAG  
CCGCAACCGGCGGCGCACGGTGCTTTGGGAGAAACCGCAGTCTTGGCGATACTCTCCACCGTCTCGCCATA  
TCCAGCATCATCTGGAAGCCCTGGGCCTGTTGTCGACACGGTCAGGTCGCTCCGCTGGATATTCTCCATCAGCA  
TGGTCTTGACCTGCTCCTGCGGGGTCAATTTCCATGGCCACGCAGGGAACACCGACAGGCCGGCCTTCTTGGC  
CGCTGCCAGACGCCGGTGCCGATCACGACGGTGTACTGGCCGTTGCTCATGGGCACGACGGTGAGGTTTTGC  
AGTACGCCGTTGGCCTTGATGCTGTCGGACAACTCCTGGATGTCCCCCAGGTTCTTCCGGGGGTGTGCCGGT  
GCGGATAGATCTTCGAGACTTCGATATATTGCAATTACGGCATGATTGTCTCCTTTCAGTTGTCAAAAAGTG  
TCAGTTGTCCCGCCGGGGTTTCCCCAGGGCCTGGGGCACGGGTTCCGGTGGCTGCTCTGCCGGCGGTTCTTC  
CTTGGGCACCGCCTCTCCGTCCGTGGGGGCTCGACCGGCCGTGGGCCGGAACAAATCATCCGGTCAACAGTC  
CACCAAGGCGGCGGTAGTGCCACACGTCCCGGAAATACATGGGGGTGTACCAGATGTTCTCCCGGGAGTGG  
GGATTAGCGGGTTCCCGTCGATGCCAGTACACGGATGGAGGATGCTGTGCCAATCACCAATACCCAGGGCA  
CCCCAGCAGGCTCAGCTGGATATAGCACATAACCCACGATGTAGTCAATATCCTGGGCCACGAACAGCACC  
GACGTCTGATAGTTACGTTTTGGAGCTTGCAATTGCTTGGCAAAGGCCACCAGGAGGGCCCCGGCGCCGAGG  
CTGGGTGCTTGACGGACACCCACCCCGCCGCTCCATCTTCTCCTCCAGGTCTTTGCCGTAGGTCAATTTTGC  
CATCATCTTGACACGTTGTACGGCGTGAAGAACTGGCCGTTGTGGTCTGTTTCCGAGATCCAGCGCCATGAAC  
ATTTCCCCGAGGAAGTCTGGTCTGGATTTTCGTGATGCCGCTGACTACCTCAGCGAACATCCTGCAGATGC  
ACTCCAACCTCCTGCTTGTGCTACTTGGAGGCCAGGGACATATAGGTCTCCTCCCTGCCCTTGGCGTTGCTCTT  
GTCCACGGTGTGGAAATGCTGATGGCAGCCATGACCACAAAATCTGCCAGACAGTCCAGCGATTGTGCCGC  
CTACACGCTTGGTCGAAAATGCGGATAAACTCTTTTGTGCTCATTCCGCAGCTGCCGGGTGACATTCCGGG  
CCATTACGACCCCTCCAGTAGTAGGGGTAGCAGAATACATGGCCCTCCGATGGCGCCCCACAGTTGTGCTTC  
TCCCCCTTCTGGCTGAAGAACACAACCTCCAGGGGCGAGATGCTCGGCCCGCTCAGGGCGGTGCTGATGGCTA  
TGTAATGCGCCTCCGTCCGCTCGGCGGACTGGACGCTCTCGGCGGTGGAGAACTGCCCCCTCCTGGTAGATCAC  
TTCATCCAGCGTTCGGGGAACGCCGGGACAGCATAACGTTGAACACGACCTCGGCCACGGCCTGCTGTCCC  
TCGAACGGTCTCCCCCTGGCCTCCAGCCAAATTACCTGGCCAGGTGTCCGTCTCTGCGCCGGTCAGCTGGA  
TTGCCCGGTACCTCCCCGGGCTCTCCGACGGTACGGCCTCTGGCGTGGCCTCTGTGCTTCTCCTCCGGGGG  
GATGGTGGTATAGGGGGCGTCGATAAACTCGTCTGTCTCGGCCCTGGGGGCCCCCTGGCGGATACACAACGGC  
ACCGCCAGGGCGAGGAGCAGTACGAGAACGAAAAGGAATGCTGCTTTGTTTCATCGCTAAAAAGCTCCTTTGTT

TTCGTCGCGGTCAAAGTCATAATCCTCGGCTTGGCCGAGGGAAGATATGCCGCGCTGTGCGAGGCGTCCGAGG  
ACGCCGTTGATGTACTTCCAGTCCCCTTGTTCCTCGGCAAGGGCCGCTTGCTCAAAGGCATACATCAGCAGGT  
CGATCCGGTCTTTGGGGAAAGTTACTGTCCACGTCCCGTTTGTCTCGTCGCGTTCGCTCAGGTGGATGGCCTG  
GAACACGCTGGCCCCGTCTGCGTCGGTAGGGGGCGTCTGGCAAACCTGGAAGAGATGGCGTCGGTATAGGCG  
GCGACGGTGACAAGCTCCTGTTCTGGAGACGCCGAAGTAGGTGCTGGCATCCAGACAGCGGTAGCCAGGTACT  
CGGTACGGCGCTCTCCGCCGCTCGCGCGCACGCGCACCACCAGAGAGAGAATTATTATCCTCTCCTAA  
CCTAACCTGACCTAACCTATCCTTACCTAACCTATCCTGTGTATCCAGTATGGATACATCGGCGCAAACCGCT  
GGAATTGCTGGTTTTCTCTGCTGTATCCTCCTTGGATACAGCTTGGATACACGGGCGCGCGCCCTCGCTCG  
GATGGTCGGTATAGGCTCCGTCCGGCTTGAGGTATAGGGTCGGCTTGTAGCGGTCTTTCTGGATATAGTTTGA  
GATTTTCCAGTGCTTCAGCACAATGACGCCGCTATCAAACGTGAGAACAATCGTTTCAGGATCAGCAGTTTC  
AAATCGTCGTCCGCCGCCCAACCAGCTTTTGTATCCGCCGGGCATTACTCAGAAAACCGTCGTCTGCCGCC  
TCATGCCAAGGTGGAAGTATAGCGCCTGGGCGGACAACGGCATATCCATAAAGGCATCAGTATCAACGATTTG  
CAGGGAAAACATTCTGCGCTGAGCCATACTCTACCACCTCCGCTCAGAACGGGAGTTCCTCCGTCGTCTCTTC  
CAGCTCGTGGAAGTGGTTGTGCGCGTAGCCCCCGGCGCTATATCCCCCGGGGCGTAACCGCCATATCCGGCG  
TCGCCATAGCCGCCAGCGGGCGGATACTGCTCAGCAGGCGGCGGGCCGGAGGACTCTTTCTTGCTGTGCGCGA  
AGTAGCAGCTGTGCGCAACTACCTCAATCGAGATTGCGCGTTGCCGTCCCGATCCTCCCACTTCCGGCTCTG  
GAGCCTGCCGTCCACGACCATCATCCGGCCCTTGGTGAAGTAGCGGCTGACAAACTCGGCGGTATTCCGCCAC  
GCCACAACGTCGATGAAGTCCGTGACTTTCTCTCCGTCTTGCCCTTGAAGTCGCGCTCCACAGCCAGCGAAA  
AGGACGTGACGGCGTTGCCGGACTGGGTGTGCCGCAACTCCGGGTACGCGGTGAGACGGCCCATGATAGTGAC  
ACTGTTTCAGCATTGGCGGCTCCTTTCTCTTGGCAGATCTGAACGACCCGTTTACACCGCGCCGTGTCAAACA  
TACCGATGTGGGTTTTCTCTTGGGGCAAGCCCATCTGCTCGGACAGCCAAGCATAGGCGGCCCTTGCGGTGCC  
CTTAAAGCGCCCCCTCTTTCCAGAGAGGGTCAAAGGCGGCGTGAGCCTGCTTTTTTCAGTTCCCGCAACTCCATA  
TCAGCCAGCCGCCCTAGGGGACGGTCGGTGCCCTTGTGTACGCCGACATAGGCATACCCAGGGCAACAGCGGC  
AAAGGTAAATCATGCCGTAGCTTTTGCCATAGATAACCTTGCTGTCCACGAACTCGGCCCGTCTGCCGCAGTA  
GTCGCAGTAGACTTCTTTTACGGTTGCCATTCTCCTTGTATCTGGCAATTTGCTCCGGGGTGTGGGTATCAA  
TACCGAGGCCCTTTGCAACATAGATAGCGCCGTCAATCAGGCGGGCCATCTCCTTTGTGTCCAGGGTGTGCGT  
ACGCTTGTAGAACAGGTAGCAGTTATACTCCCGCCCCCTCCAGCGTCATGGTCTTGTAGAGCCGGTAGTAGGGA  
TAGAAGTCGTCCATATCGGCGGACACGGGGAGCATGGCCCCCAGGGTGTGCGGTCTCTGCTCTGGCAAGGG  
CCCCGTACTCCACCACCAGACTGCGCTTTACCTCGTCGTGCGCGAGGCTCTGGGCCTCGGCGATTTTGTGAC  
GAGGACATGGAATATGCGTTGGCGTCTCTGCTCCGGGGCTTGCGCCACTTCTTGATCTCCACGTTGATGTG  
GTGTCTTTGAGAGCGTCGTAGCGTCCCGGAAGTCGTGGTCACGGTGATGGTGATATGCTGCTCTCCATGAG  
CGCCAAAGGTCAGGTCTTTCAACCGGCCTTTCAATTCGCCAGCCACTTCTCCTGGTAGAGCCCCAGGAGATCA  
CGGGCTGTGAGCCAGTCCAGGAAGTCGGAATGACAGGGAAAATGCTGGGGGTCTCCTCGCGCCGGTATTTCT  
CCTGCCAGACGTGCGTTCCGTTGCTTACCAAGTAGGTGAAGTGTTCCGCCTCCGGCACCAGCTCCAGATAGGT  
GGGGTGCTGGGTGCTGTGCAAGTATTTGCCGCGGTATAGCCCTTGAGAACTTGATGTCATAGATGCCCCCA  
GCGAGAAGCGCATCCAGCCGGCCGTAGAGAACGAGCGTCAGGCCGCCACGCAAACTCTTTCCGGGCCCCGGT  
ATTGCAGGACGCCCCCGCCGACGATGGCGCGCATCTTGAGGCGGCGCCGTACCAGCGG  
>MA\_1\_4\_20\_S31\_clean\_1\_93789 flag=0 multi=5.9877 len=5020  
AGCGCAAGGAATTTATGCGCCAGAAACAGCAAATCGTAAATACTCTTTTCTGCAAGGAAATAACTGATTCTG  
TTACCCCCCGCCGAAAACTACAAAATTTCTTCGGCGTTTTCTTACAATTTCAAATTTGGCGTTGACAGTACA  
TTCTGGAGAAAATCAGGGTCGAGGGCGTGCTGCAGGACATCCTGGCGAAGAGCAATGGCGAAAACGTACCGT  
CACCTACGGCGGCAGGGAGCAGACTCTGACCGCAGCACTGGCGGCCATCTTCGCCAGTGTTACCGAGCTGCCT  
ACGGCGGAGGGTGTGGTTACCAAAATCAGTGCTGCTATCAGTGAAGTATCGGCGGGGCTCCGGAGACCTATG  
ACACACTCAAGGAGATCGCGGATTACATTGCAGCCACAAGGACGTTTCCGACGCCCTCACCAGGACCATCGG  
CAGGAAGGTGGACAAGGTGGAGGGCAAGGGCCTGAGTACCGAGGACTTCACACAGCGCTGAAGGAGAAGCTG  
GAGGGTCTGCCGAGAGCATCGCGGAGGCTACCACGGAGAAGGCCGGTCTCCTGAGCGCGGCGGACAAGGCC  
GGCTGGACGGCATCCGGGGCGTCCGGTATGGCACGGAGGCCCTGCGGACATGAAGGATGGAGAACTCTTCGT  
CCGGGTCATCAGTGTGGCGGAAGAGACCTGAGAAAATGGTGCGGCCCGGCAGCCATAATGCAACTGCCGGGCC  
GCCCCGGGCGCTGATGACTAAGAAGGAGGAAGCGTTATGCCGGTTATTGAACGGGATGTAGTATTGCAGGGCGT  
GGATGAAAATGGCAATCCACCATCGATCTGCCGGTCACCAGACTGGGGAATATTGAGGATACGGCGGAGGTC  
AAGGAAGCGCCGGGGGAGGGAGACTTTCTTCTGTTATCGATGGCGCTGACGATGGACAGATGAAAAGACGC  
CCTGGGTGAGTATGCAGGGACCTCCGGGACCACAGGGGGAACGGGGGCCCGCGGTGCGGATGGGGGGCCAGG  
GCCGAAGGGAGCCCCCTTTACCTATGAGGACTTCACGGAGGAACAGCTGGCGGCGCTGCGGGGGCCTCAGGGG  
CCGGCCGGGGAGAGGGAGCGCAGGGGCCGAGGGGCGGCGGAGAGTCCGGGAAGTCTGCCTACCAGTATG  
CTCAGGAGGGGCGCTATACCGGGACGGAGGAAGAGTTGCGGGCATTTGCTGGGGCTGACGGGGACCATCGCCG  
AAAGCTGGATGAGATCAACGGGGAGGTTGTGTGATGGGAACGATCATTGAGAAGCTGGATAAGACGCTGGAAA  
CCAAGGCGGCCATCCGGCAGGCCATTGTTGGAAGGGGCGAGGCCGTGGAAGATACTGATCCCTTCGAGTCCTA  
TCCGGAGAAGATCAGCGCTATCCAGACCGGCGTGACGCTGCCGGAGCTGACGAACCCCGGCTCCGCCGCAGAT

TTGCTGGCGGGGAAGCAGCTGGTAGACCAGTATGGGAACCCGCTGACGGGGACCATGCCCCAGAAGTCCGCCG  
CCGATCTGACCGCCAGCGGGTCCAGTATCATCGTGCCCGCCGGGTACTACCCAGCCAAGTCTCCAAGAGCGT  
AGTTACGGCAACGCACCCCAAGCCTGCCATCAGCCGACGCGCGGTACCATCACCGCCAGTCACGTACAAAGC  
GCCGGGTATACCGAGGGCGGGACTACTACGGGGACGCTGTCCATCCCTACCCAGGCAGGTACGACCATTACCC  
CGGGAACAAGCCAGAAGACCGCCGTGTCCAGCGGACGCATCACTACCGGTACGGTGTATGTAAAGGGGGACGC  
TAATCTCAGGGCGGAGAATATCAAATCTGGGGTTAACATTTTTGGGGTTGCTGGTCTGTAGAAAGCCAAAGAA  
ATAGTGCAATTTGACGATTGATACAACCTTCGATTGATAATAGTAACATAACCATAGTTTATCCTGGATCTTGCA  
CTAGTACATCAATTGGATTTTCGAGTGATTTACCGGGCATAATCGAAACATTTGATTTTGAAAAAACAATGT  
ATTTTTTGTAACTATCGTGACAAATATTCATATAATTTTTCGTTTTCTGGATCTATTATGCACGACGACGAA  
CCATATCCGGGACGCATAGATATACATGGATATACAGAATATTTTTATTTCTGTACATATATGGCAATGCTC  
AAATAACTATTAAAAGTTGAGTCGTCCCTGGGTGGAAAGCGGCGGAGCATAACCGGATTTGACAAAACACGGC  
GCATCATAGTATAATAAATTACCTGCCATCCAGGTAGGACGACGGTGCCTGTACATATGGCGGTACAGCC  
CATTTCCCTCGCGATTTGATTCGGGGGGAGGTGGTGCAGATGTGGAAGGAAGCTGTTGAAAGCTCTGCTTAC  
CGTGATTTTACGGTGATGACAGCGATTTTACTTACCACAAAAGCGTGCTGACTGCCCCGGCTGGTACCCAGGC  
AGTCAGCAAATCTTTGTTGACATGTAGGGGCTGACCGTCATGTAACAGCGCCCTTCTGTTGTTTATTATACCC  
GCCCCGCCCGTTTTGTCAATGACGAACCGGGGCGGGTTTTATGTTTTGAAAAGGAGTTGATCGATTGGAAGC  
AATCATCGTGCGCGCATCGGACTGGCGGGGTCTGCCGTGGCGTATCAGATTTACTTGTATAAGCTGGCATAA  
ACAGAAAAGGCCGCCCCCGAGGAAGGGGGCGGCGGGGCGCTATTGTGCTGAACCTGATACATTTCCGTACAGAG  
CGTTGGTACAGCACCTGGGAAAAGTTGATCTTTTTCCCGGTACACCGTCCGCATACCGGCAGCACCTCCCCCGTG  
GTCGTTAAGTTACTATCCCATACAAGCCCGAAATGCGCCCTCGCGCATTTTCCCTCTTGTATATGTCCCCGGA  
GTGTGGTACAATATGTTGTAATTTACACACTCTCCGGGGTGTCCGCCCTGCGCAAGCTGTAGGAGGCTT  
GCGCAGGGCATTTTTCTTTTATCCGAATCTTCTTTTAATGCGTCCCAGCAAATCGGGATCGTCCGTGATAGGTC  
CGTATACCCCCGTTCCAAACATTCGCCCCACCGACGGTACAAGCGGCTTGCCCATCATCGGCGTTGAACGTGC  
CAGTCAGTTTACGCGCTCCTTTTCCCCGCCCCCTTCCCCGCGGCCCGGCTCACGCGCCGGCCCGCTCCGCCG  
CCGCTGTTCCGGCAGCAGCGGGCCACACACCACAGAAAGCGGCGCCCTCGGCCACCCAGCAGGTAGTCCCTT  
TGTCGGTGCGGACGCTCCCTTGACGACCTTTGCAATCGTTTCCATGATCTTCTTTTCTTCTCGGACATGGTT  
GTCCCTCCTTCTTTCTTTTCCGGCCTCCTCTGCTATACTGTTTCCGGACGGCGCGTCACCGCCGCCGAAACT  
GATAGAAAGGAGCAAAATGTTGTGTGCCCTGATCTACTGATTGCTGTTGATGTGTCTGGCCTGGAAACCCGCG  
AACAAAAAGCCGATGTGCAAAAAGGCTTTCGAGACTTGCGGCTGGATTTACGACGGAGCCAATGCGCCAGGTC  
TGACCGTTTGAATGAGGTCGCATCCATAGAAACCTACTATTTTCATGTGGGAAAGATTTGGCGATCCGGTCTAT  
CCACAGCTCCCGCCAGCCTGTGCGATTACAGAAAACCCGCTAGTGTAGGTTGAATACATCCACAGCAATCAAA  
GGAAATTCGGGGTCGTAATCCACTACGATCCTGAATTTTTCTTTTCCATCCAACCGCCGAGAGTAATTTCTTT  
TCAGCATTTCTACATGGCGCTCGTCTGTTTGCAGGGAATTTCTGAAATTGGCTTGCTGTCCGCTTGAGTTT  
GTGCAAAATGCTCCGCAACACATCTATAGCCTCCAGCGTGTCCATCCCGTTTTCCCTCCTTTTCAATTTGCCGCTT  
TGCCCTCCCAACTCTCCCGCTCGTCCCTTGCAATTTCCACCGTCTCCCGTATAATCCAGGTACAAGCCCCCG  
CCAGGGCCGAGTACATAGAAAGGAGGAAGTCTTTGTGGATGCTCTGAAAAAATTCGAGGACAAGGTTACGAGT  
GAGTATGTAACCCATCATTTCTTGCAAGTTGATGAAAGACACTATTTTCGCTCGCCAACGATTTTGCAGATGTTG  
AAGACCCCGCAAAAGTGTACGAACACCAGATTGCTATTTTCAGCTCAACACCGCTTTGTTTCACTTGCGCTGC  
GAGAATATCACTGTATTCTGTGCGAGTACCTATCGAAACATGGAATAACCTTGCCAGACCTAGAATCACTGAT  
TTCCGAAACCTATCAGGATTGATGCTCTCCCTGCCGCTCCTGCACCTCCGGCGCTGGGGCGGCACTCTTTTTTT  
CGTCCACCCCGTTTTCCCTCCTTTTCGTTTGTGCGATTACGACAATAATAAATCATTATCCGACATTTGTCAATA  
CCCAAAATGTGCGTTTTCAACTTTATTGTTGACATCCGACATTTTTCGCTGTTATGATTGGCAATACAGAAGGG  
GGTGAACAATTTGACAATAGGCGAGCGCCTAAAAAATCTACGCAAGGCCCTGGGCCTCACCCAGCAAGAATTT  
TCGGACAAACTGAAAGTAAGCCGGAGCAACATTGCCACCTACGAAGTCGGCAAAAAAATCCCGCCGAGGCGG  
TTATCAATCTGATCTGCCGGGAGTTCAATGTATCGGAAACATGGCTGCGGACCGGCGAAGGGGAAATGTTTGT  
GAAGCGGACCAGGGACGATGAACTGGCCGCGTTTCATGGATGAACTACTGGCGGAGGAAAGCGCGGACTTCCGG  
CGTCGGCTTGTAAACCGCGCTGTCCCGGTTGCGGCCGGAACAATGGGAGGCGCTGGAGGCCGTGCGCCTGGAGC  
TGATGAAAGACCCCGCCGCCCGGCCCTTTGCCCCGCCCATTTCTCTACCATTGAGGAGGAGGCCACGCCGA  
GGCGGAGCAGCAGGCCAGCTTATTTACCAGCAGATTCTTTCTGAAAAGAAAGCCG

>MP\_1\_2\_20\_S60\_clean\_1\_73531 flag=1 multi=4.0000 len=9045

CAGCGATGGGGACCGCTTTTGCCGCTCTTTTGCCAAAAGCACACAGGAAATCAATCGTTTTTACAACCTCTC  
GAACCAGACAGGCGCCTCTGTCCGATCAATCAACAATATTTTCATCTGCGTTAAAAAAGGTCGGCGGCAGTGCT  
GAAGCGGCTCAGTCTGCGATGCAGAGCTTATCTGACAAACTAATAAGATTCCCGGCGCTTGAAGATCAGCTAA  
AACGTATGACGGGAATGACCGACATCAAAGATTGCAACGGCTACGTTAAATACGAAGAGATTCTTTTGAGACT  
CCGCGATCGTGGGAAGGATATGCCCGAGGCGTTGCACAAAACGAGGCTGCCTACTCGGACTTGAAGGGATT  
TACTCTTCCCTCATGAAACAAGATTTTCTGTGAACTTGAACAAAACGAGCAACAACAGGCGAGCTTACCG  
ACATGATTGATAAATCGGCCGATTCGCTCACCGTCTTGCGAATGAATTCTCTAACACATGGGAAATTATCTC  
AAACGGGGCAAAAGCCGCCGCTGGACAGCTATTGAGGCGATAGGACTCGATAAAGAACTAGCGAAAGTTAAC

GACAAACTATCTAAAGGTTTGCCTGAAGTGCTCAAGACAGAGAAGTACATCTGGGACAAATCGAAAAATCCTG  
TTGATTGGGCCTACAACATGTTATTCAAAGCCGATGACTTACACGAAGATAGGCTCTACGAAGAGCACAAGTT  
AAGCGATGAGGAAGTACAAAAACGCCTCAGGAAAAAGTACAAAAAATCTTACCGGTTCTAAGCGATGAAGCC  
GAAGAAGGCGTAGACAACATCGAATATTTTCGATCAGAAAGGCTACGAAGATGAACTTGCTAAGTACCGCAGTT  
CACAAAAGGATAAGCAGATGACGACACTACCGGCAACTCAGTCAACGCAACAAGAAGTGCCTGAAAAGATGAC  
CCGTGGACTGCGCAATAACAATCCTGGAAATTTACGGCCCACTTCTATGAACAGCCCGCAAAATGGTGGCTTT  
CAAGTGTTCCTTCACGTGAGGCAGGCTGGGGCGCATTAGGACGACAGTTAAAAGGTTATGCGAATGCTGGCC  
TAGAAAACATCTACTCCATCATTTCAAAGTATGCCCCCTTCAACAGAAAACGACACAGCTGCATATATCAATGC  
TGTAGCCGCTCCATGAGCCAGCGTCTCGGCACAGTTGTAACGCCGGATGCCAGATTGGATTTGAAGGATGCA  
AGAGTTTTGAAAGCATTAAATGATGGCTATTACAGACCACGAAAATTTCAAAGGCGCTTCCCGCTATTTTGAAG  
GTCTTCTTTTGATCGTGAAGTGGGTGCCGCCTCTCAGTCTGAATGGAAGAGCAAAGTGGTAAGCGACAGAGA  
CAAGTTTGCTTCTAATGGACAGGTCACAGTCAACCAGAACATCACAATTAATGGAGCAGACAATCCCACGGCT  
GTAGGTAAGGCTGTAGCCAAGGAACTCTTCTTGCTCAAAACCGATACGGCACCAGAAACATTAGTTAGGAGG  
ATCTATGCCTTCTTTGCCATACAGCCTCGAGGCATTACTTCTCGGAAGAAAACGAGAATTTGCGGGCATTATT  
CCTGATGTAATCATCAGTGAAGAGCATGAAAATGAGGTAATAGTTACCCGTCATCCGGTGGATACAGGGGCCA  
ATGTTCGACAGCATGCTTACTGTTTGCCAGCGGTCACTCAATTCGATGGTCAGACTCTTCAGATT  
GTTAAATTCATCTTAGATTTTTCAATCTTCAAAGGCTTGACCACTACAAAAGATGTTTACGAAAACTTCTT  
GAATTGCAGGCCAAACGAGAACCTTTTCGCGCTATCTACGGGGAAAAACAATACCCGCGGTAATCATCACCA  
AATTAACAAACGACTTCAACAGTTCGACACAGAAAGCGCATTTGGTGGTTGACATTACCTTTGAGGAAATCCGATT  
TGCAAAAACCAAAGAGGTAACCTCTTCAAGAGGCGCAACAGAAAAATCCACAGCAAAACCGCATCGGTCAATCAG  
GGCGGAAACAAAACCTTCCAGTTTGACCTCGGCAGGCAACCGTCCAACCGCAAAAGTGAATATATGACATACCAA  
ATTCCATTAGGTACAGGCTCTCAGAGTTTTCTCAACAAAAATTAGGAGAGCAGACCTACAAAATAACGATTATTT  
ATCGGCAGGCCGATGGCGGCGGTTGGTTTTCTCGATATGGAGACGGATACAGAGGCAATCTGCGGGATTCCGCT  
TGTGACCAATGTCAACCTGTTGGAGCAATTCAAATACAAGTCTATGGGTGCAGCACTGTGGTGCAGAACTATCC  
AGTCACAGCCGAAAAGTCTACGAGCCAACCTACTCCGACATGGGTGCGACCCCTTAACCTTTATTGGAGCGATG  
AATGAGTGAATAAAAAACAGGCAGTGGCTGCGCTATTTTCGCCTCGTAATCGCTACTGACAAAAACAATCAG  
CAGGCCATCGATTTAAGTGAGTTCGGTGCAAATTTTCATATTTCTCAAGCTGTATCGGCAACCTTGCACGG  
CAGAAATCACGGTTTACAACGTCTCTAAAGAACTATCGACAACTTGGTATCGGAACCAACAAAATCGAAGA  
CAGCGCATGAAGGTGATCATTGCGGCTGGATACAAAGACAATCACGGCATTATTTTTTCAGGGCGACCTTTGG  
TGGAAATCAACCGGTGAGAAAAGCGAAACGGAGACATTTCATGAAGCTAGTCGCTGCTACTGGAGACAAAGCAC  
GGCAGTACGCAGTTGTCAATGTTTCAGTTGCTAAAGGTGCAACCCAGCAAAACCATATTCAAAAAGTCTGCGA  
GGCTATGAAGGCCAAAGGTGTTGACGTTAAAAATGCCTCAGTCCCGTTTCATGGACACACGTCTACCAAGAGGA  
AAAGTTCTTTTCAAATGGCCACAGACGCCATGAATGGCATAGCTGATACAAATAATTTTCGATTGGGGTTACG  
GAGTCGATGGATTAGTAGCTATTTCCAAAGAACCGGTATTCATCAGAAAGAGACTGTAATCGTACTAAACGC  
AGATACAGGCCTTATAGGAAGACCGGAATTAGATGAGGAAGGTTTGGATGTGCAGGCTCTTTTAAATCCTAAA  
TTGGAGATTGGAACCTCATTCAAATTGACAATGCATCAGTGCAGAGGAACTCATACGACACCACTGTTTCTG  
AAGGCGCTATCAAAAAACATGGCTGTAACCGATGATTTTCTTTTCGGCCGATGGAATCTATCGAGTGATTTT  
ACGTGAGCACATCGGAGACACCAGAGGCGATGAGTGGTACACGAGTCTGATTGTCTGTTGGGCGTTTCTTCGGCT  
TCTCAGCCTATCGCACCTTCTATATTACATTTACATCGAACTGAAAAATGGATTCAACTTCAAATATTTTT  
GATCCGAATAAGTTACCGGATAAAGCGATTAATAGTCGATGACTATGGTGTGGACCGCCCTCCCCGGAATTA  
TTCAGAGTTTCGACCCGCAAGCATTGACCTGCGAGGTACAGCCGGCTATCAAGGGGAGAATGACAACCGAAAA  
AGGCATTGAGCTTGTAAACATGCCGTTGCTTCTTGATTGTCCCGTGGTGTCCCTCATGCAGGAGGTTGCTCT  
CTAACATTTCCAATTACGCCGGCGATGAATGCTTAGTTGTTTTTCTAGCCGTGCGATTGACTTCTGGTGGC  
AGTTAGGAGGTATTCAACCTCCGGCTGAGGCAAGAATGCACGATTTGAGTGACGGATTTGTAATTCCTGGACC  
ATACTCTCAGGCCCGAAAAATCTCAGGAGTAAGCACATCGGCTTTGCAGATCAGAAGTGATGACGGGACCGCA  
TTCATTGAAATCAACCCATCGTCTCACAATGTCAAATGCCAGACTAACGGAGATTTTCCGTCCAATGCAAAA  
ACTTTGCGGTTGAGGCGAGCGCTTCGGCAACGATTACTTCGCCGTGCAATAGCTCTTAACGGTGCTCTGACAAA  
CAATGCTTCTACTGAGGCTCAGATGACTGGCGGATTGAATACAACGAAAGACGTGACCGCTTCAGGAATTAGC  
CTCAAATCTCACACCCATTCAAATGTTTCAAGATGGCCCGGCAATACAGGAGGCCCGCAATGAAAGTCAGGAA  
ATTAAACGCAGATGGCGACATGTGTATGGGTACGGCTCTGCCGATTACATCGAAAAACGCGCGGAAGCTGTA  
GCACAGAATGTTATGACCAGATTGTCTCTCTGGAGCGGTCAATGGTTTTATTGATACCGATGAGGGCACTCCTT  
ATTTGCAGGAAATCTAGGGAAACATGATGCTGTTGATTGCTTATCAAACAGCGGATTTTAGAGACACCCGG  
GGTCACACAGATTGAACAGTTTGAAGGCTATTTTCGACCCTGACACCAGACGGCTGTCAATCACGGCGGAAATA  
GATACAGAGTACGGAAAAACGACCGTAAATGGAGACATTCAATGATAGAAGATCCTGTATTCAAAGTTACTGA  
GGCAGGCATTTTCAGTCTCTTCGTACGCAGAAATTTACGAGTATTACAAGCAGCGGATGCGTGAGATTTTCGGA  
GACGATATAAACCTTGATGCTGACACTCAGGACGGTCAGATGGTAGCAATGTATGCTCTTGCATTATCGGACG  
TGAACCTACAAGCTATCGCTGTATACAACGCCTACAATCCGAGTACCGCAAAAGGCATAGCCCTCGATACAGC  
TGTAAGAGTCAACGGCATCCAGAGGCGCTCTGCATCCCACTCCAGGCCGATCTAAACTCATCGGTGAGGCA

GGCACTCATATCATTTTCAGGAGTTGCGTTAGATGAACAGGAAAACAAATGGCTGCTGCCTGAGGATGTAGTGA  
TTCCGCCAGCGGAGAGATTGTTGTAACAGTCCATTGCGGAGGATGAGGGAAACATTAAGGCTGCACCCGGTGC  
GATCAACAGAATCGGGACTCCGACACTTGGGTGGCAAACAGTCACCTAATGCCTTAGCGGCCGAAGAAGGCGTG  
CCTGTTCAAACAGATGCCGAACGCGCATCCAGCAGACAAAAAGCACCGCTCTCCCAAGCGTTTCGCTGTGGG  
AGGGGATTGTCGCCAGTTTATTAACAACAGATGGAGTAAGGAGAGTCAGCGGTGTCAAAAACGATGGAGATTT  
ACCGACAGATGAAGGAATTTCCCGCCACTCCATTGCGATGATTGTGGACGGAGGCGATGTAGCCGAAATTGCA  
AAAACCATATTCTTAAAAAAGGCGAAGGCGTTGGCACCTATGGTTCTACCACTTACACCTATCTGGATACAT  
ACGGATTTCCAAACAAAATTTCAATTCTCACGTCCGACCAATGTAGATATTTTCTGCGAAATCAAAATATCCCC  
CGCTCGAAATTTTCTCTCTACAGACGAGGAAGAAATCAAAGCCAGGATAGTGACTTACATCAATTCGTTAGAA  
ATTGGCGAGAGCGTGAATATTTCCCGAGTCTTAGCCAACGCTGTAAAAACCGACAACGGTGTGCTTGACACGA  
GGTTTGTAGTCAATGACATTTCTCTAGGTGAATCGTCTACCCAACCTTACAACGCAAGCGTAGATATTGAGTG  
GAACGAGGCAGCTATTTGCGAATTGCAAAATGTGACTGTAACAGTTGAGGATGTATCATGAATCATGAAAATC  
AATATACCGAACTGATTGCAGGGGCGCATTTGAAAAACCAAATACTCAAGGTTTATTTATGAGATAACGGA  
ACCATTGAATATTGCTAGGAAAAGGCTAGCGCTTCTTTACGAGAATTTTCGATGTAGATACCGCAGTCGGAGTC  
CAGCTAGATGCTATAGGGGTCCGAGTTGGAATATCAAGACATTTGCCGATGAAACTCATCGGCATTTATTTTG  
CCCTCGATGATGTGATGGTGTGGGTTTTGATAGGGGTGTGTGGAAAGGTAAGTATGACCCTGACGATGGCAT  
TGTCTCTTTGGACGATGAAACATACAGACTCGTAATCAAGACCAAATCCTCGCCAATAAATTCGATGGCAAA  
AACCAGTCAGTTCCTGAATTTATTAACACAGTGCTCGGTTACTTTGGCGTACCGGCAAAAATTTTCGATTTTC  
AGGACGAGCAAAACATGCACGTAGTCCCTGAACATGACTAAAATCCGAAACACCTCCCATTGTCTGGGAACCTTAT  
CAGCCGCAGACTCATCGACATTTGTGGCGGCAGGTGTGCGAATGCAAATAGTCGATAACGAACCGTATTTTGGGA  
TTGATTATGAAACAGCCTCTGTCAAGGGTTTTGACGAGGGTCATTTCTTCCCGTTTGAAAACCTAGTTAGCAG  
GTAAAAGAATATGTCAATAATGAACGAATTCCTCCCGTTTGACGAGGCCGAAAACGCAAACTTGATACCATTTT  
TCAGAATGGCAAAACGCAGCCGCTCGATTGAGCGGCTTTTCTTCGGGTATTGCGCGCTCCAACCAGATCAACC  
GCGCAATTGCTCAGGGTGCAAAACATAAGCTATGCCATCGCTAAATTCATTGAAAAGAACTCTCAAAGAAGACGT  
CTACGTTAGCAACCCGGATCGTCTCGTAGATCAGCTCTATAGAGCGATGCTTGAGATGAGTTATAGAGCGACT  
CCTATCGGTTGCATTCTCACATTTCCCGTTTCAGGTTGAAATTGAAGGCTTTGTGCTTTCAAACCTTTGGTGGCG  
ATTTGTACGATATTGATTACGACAAATTTTTCGGGTATACGGCACAAAATTTAATGTTTCCAGCACACCAGC  
AAACAAGTTCCGTTATTCCAAACCTTGCAACAACCTTCTTGAGGTTGCAGGCCAGCTCGCAGAGATCGGTTGC  
TTCGTAAAAGCTGGCTTACCGAATATCCCGGGGAGCCTGGAGGTTTGGACTGGAGTCAGAGGTTATTTTTCAA  
TTTCATCTAGCGGTGCCTTTTATTCAAGGAACAATGGTGAAGCACCGATCGTCTTAAATGGCGGCATCACTTA  
CGAAGGTAAGACAGATAACCATATAGATTTTTCTCCGGACGTTTACAGCTCGATTTACAAAGTCGGAGTCAAC  
ACTGTTTCAGCCGCCGGCACTAAGATCATTGGCGTTAATACGCGCGTATTAAACAGAGCGAACGAAGAGCAGAC  
ACTGTACTGTGGTAGCACTTCCGTAAATCGGATTTAAATCTCCGGCATTAAGGAGAAGGTAGTATTTTGCC  
AAGATGCGCCCGTTGAATTTTTTAGTGGTAACAATGTAATCAGGAAATCTGGCGATCATTGAATAAGGCGACTC  
TGAGTCTTTTTGGTTGTATGCCAAAACACTTAACCAGCCTCCCGGGATATTCCGAAATTGACCTTTGTGCGCC  
TTTTGCTAGAATACGTTACCTACTCTGAAGGACATGGCAGAGAAAGGGATTGGAAAGTTGCTGGTTATCTTT  
CCATTCTGTGAAGAAACCAAGCAAAACGGCTCAGAACTACCAATTCAGAGCCGCCTTATAAGGATGAGATCCA  
TGTTCCAATTAATCTCATGCCTCTAGTATAAAGCGCATTTGTGAGAAAATCATTAATTTGATACTGACAAT  
GGTGTCTATGTTGTACTGCTAGGCACTAAGGTAAAGAGCCCCAAAGCGAAAGCTGAGGGGTTCAAGTGTTTTT  
AGACCGAATATCTCGGGTGCGGGAGTCGAATATATGGAACCTGAGCAATTTGCCACTCCTGAAGGAGCTTTCA  
GAAAAGCGAACTGGAATTTCTATTACGACATCGAGTCTCAATCCGCGAACAAAGAGGCGGGTTTAGAGAAAC  
CTCACTAACATTTTCAGCCGGATGGTCAAACGATATCTATAAAGATTCCATTTGACTGTTCAACCATCGGCT  
ATCCAAGCACTTGCTTAAATACGCTCTTATTAAACATAAAGAGCGCAAGGCCGATGGTTGGTTTGTGGTTCGAG  
CTACCATAAGTAGCGTTATACGTACTCGGGTCTAATTTAAACCTAACCAGGCCGCTCTCCACTTGACTTGAT  
TACCCGCAAAACGATTTTATTGCTTCTGCTGCACCGTCTAAAGCAGTTACAGCTGATCCGCTGGAGGCAGT  
GGCGTAGTTGTGCTGTGGAATACGCCCAAAATAAATTTGAGCGGGAATATTCCGGAATTTTCTTTGAACTGTC  
AGAAGGCCCGATACAGCTTAGTGGAAGTCGATTTTTACGCTGTGCCGGGCACATTATAAAAAGTTTCAGCTTTT  
GGAGCTTAACTTATTTATTTCTCAGGTTTTTCTTTGAAAATCTGAGCACATTGAGCACACTGCATTATGTAAG  
CGTGCCAACCAAGCATAACTTTAGACCTAGACGCAAAATAATCGCCTCTTTGATAAGCACGTACGACCTGCGA  
ACCACTAAATGAGCTAAACACGCCTCTGCAACTTCAAAGGTACATCATTGTCTGCGAACCAAGACCTACCA  
ATTGAGCGCAAACCATGAGCGACAAGACGGTCTTTGAATACCTCTTGTCCGTGGAGCCATTTAGCAAGAGCTT  
GAGAGGAAATTGATTTATTTCGATTGATGGCCGGAAGAGGAAAGGCGAACGCTTATTTTTCGCTATTCTTTT  
AGCCTCGTTTATTAGGCGAATTAAGTATGGCGTGATCGGTATCCGATGCACTCTTTTCATTTTCATAAATCT  
GCAGGAATGGTGATAGCCTCATCGCTTATCCATTCCAACCGGATAGAAACAACCTCTCCCGGCCGAAGCAATG  
TCGCCAAAGAGAAATAAAAAAGAACACGGTATTTTGCCGGTGCTAAGGATTCAATTTGCGAGACAAGCATAGG  
CAGCTCTTTCCAGTCCACTGCCGCGCATATGTTTCACGGACGGGACTGCGAATACTTTAGTGATCTTTGTTAGA  
GGATTTGAGTGAAGATATCCAGCATTAACAGCCATGTGCAATATCTCTTACTCGCATTAACAACCTTTTTTA  
CTGTTGACTGTTTGCCTTCTTTTTCGACTGGTTCGAGAAGTTTAAATTAGAACCGGCGAGTTATCG



>MP\_1\_3\_20\_S79\_clean\_1\_166317 flag=1 multi=5.0000 len=6337  
ATTGAGGCTATGGACCTTGGAGACGAGGCCGAGCAGCTGGCCGGGCCACCATCCAGGGGTACGTTGATGCGG  
CAAACGATATGCTCCCGGCGGTGCGCAATGCGTATGCGAATTTGGCACAGGCGGCGCAATCTGCAATGGGATA  
TAAATGGTCTATGTCCCAAGCTCCAATGCTTACGTTCTCTCAGCGCGGCTATGCCAGCGGCACAGAGAACGCA  
GAGCCAGGCTGGGCCATGGTGGGCGAGGACGGCCCCGAGCTGATGTTCTTCAACGCGGGGAAAAGGTTCTGG  
ATGCTCCCGGACTTCCGCCCTGCAAGCGAGGCCGGAGCCCCGCCCTGTCCGCCATGGTAGCGGCACCCGGGGG  
TGGCTCCTCCTCTGTCCAGGTCGTGTTCCAAATCGCCGCAACGCCACGCCGGACACGGTTCAGGCCTTGACG  
GACTACGGGGACGACTTCGCCGAGCGGGTGATGGAGGTGGTGGAGAACGCCGCGGCGGATGCCGCAAGGGGGG  
CATACCGATGAGAACCTACACCACAGTACAAGGGGATATGTGGGACAGCATCGCCTATAAGCAACTGGGGGAC  
ACGGCCCATACCGATAAGCTGATGAACGCCAATCTGCGGTATCTGCGATACTACACATTCGCCGCCGGCATCG  
TCCTGACCTTGCCGGAATCGGCGAGAGCGTCAGCGACACACTGCCTCCCTGGAAGCAGGTGGGACAGTGAGC  
AATAAGAATTTAGCCCGCCGGGCGGCTGTGCGGATCTCTTTTGCCGGCACCGACATCACCAATCCATCAAGC  
CCTACCTCAAAGCCTTTACCTACACCGATAACGAGGCGGACGAGGCGGACGACATTCAAATCCAGCTCCACGA  
CAGGGACACTATCTGGATGGAAAAATGGCTGAACGAGGCCATTGACGCCGCTCCGCCGCAAAGCTGAAGATA  
GATTGCGTGATCGTTGCGGAGAACTGGCGGGGGGACGGAAAGGACGTGGTTCTCCCTGTGGAGAATGCGAGT  
TGGACACCGTAGACTACTCCTCCCCCGGCGGTCAATTACCATCAAGGGAACGTCCCTGCCCTTCAGCGCACA  
GATCAGGCAGACCAAGAAGAACAAGGCCTGGGAGAACACCACGCTCTCGGCAATCGCCAACGAACTCGCCGGG  
GCAACGGCATGACTTGTATGTATGAGTCTGCCAACGATCCGTTCTATAAGCGGGTGGAGCAGGTGATGCCA  
GCGACATTGATTTCTCTCCCGCTGTGCCACGACGCGGGCATTTCCTGAAAGCCACCAACAGCATCATCGT  
CCTGTTTGACCAGGCCACATACGAGGCCAAGGGTGCGGTTATAACCGTCAGGAGGGGCGATGGAAGTTATACC  
AAGTGTAACCTTACGGTGGTGCGCCGACGCCCAGTATTCGTCTGCGGGTCAGCTATGTAGACCCGTCCA  
CAGGCAAGTGCAATTGAGGCCACCGCCAAAATCGAGGACTACAACGCCGACGCCAAAAACAATCAGCAGTTGGA  
GGTAAAGGCAAGGGTGTCTCGAAAGACGAGGCCAAGGCCCTGGCGGAAAAGCACCTGCGTCTGCACAACAAG  
TATACCAAGTCCGCCACCTTTACCATGCCCGGCAACCCCGCCCTGGTGGCTGGCGTCACCGTCATGCTGGAGG  
GCTGGGGCGGCTGGGACGGCAAGTACATCATACCCAGGCCAAGCATACGGTCAGCGATTCCGGCTACACGAC  
CCAAATCAAGCTGAGGCGGGTATTGGAGGGATATTGATGGACGTTGAAAAAATCCTGGGCGCAGTTGGTGCGCA  
TCGGCACCGTCACATCCGCCGATCCCGTCAAGCGGGTGGCCCGGGTGAAGTTTCAGGACACCGGCATGACCTC  
TGGCCTGCTCCACGTCTGGCCTCCCGCCCATACATCCCGGACTACGAGACAAAGCCCCAGCGCACGGAGTTC  
GAGGCAGGAGGCAGCGGCGACGCCGCCTACGAGCGGCACAAGCACGATTTGGAATCAAGCCCTGGATGCCCA  
AGGTAAACGCTACCGTCTGACGCTGTATCTCCCGATACTCGACGCAGACGGTTTTATCCTGGGGGAGATCGG  
GCCGCTGGAAGGCTCAAACAGATGGAGTAGGGGGTATCTTAAGGCAATTATCGGCTGTCTCGGGGACGTTGT  
GTTACAGGTATCCGAGGCCACCGTGAGGACGCTGGACAACATGACGTGGTCCGGCTCCGCCCGGTATGCCGTC  
CACAAACCGGCACCTGACCCACGCCCTCACGGAGTTTGTGTTGGGCTTGACCCGGACAAGATCACGTTTGATATTA  
CGCTCTCCACCGACCTTGGCGTTGACCCTATCGAGGAGGTGGTGAAATCTGGAACATCGAGCGCAGCGGGAG  
GGCGGTTCCGCTGACCGTGGGCACCAAGGGCTACGGCAAATACCGATGGAACATCACCAAGCACGAAATGAAG  
ATGAAAGCCCATTTCGCAACGGCGACATTACACCCGCCACGGTGTCTGTGAGCCTGCAAGAGTACCTGGGAG  
GTTGACGCTATGAGCTATACAGTCTCCGCAACAGACCTGGGACGCCTACGGTTCAATGAGCTGGAAACCGTGA  
ATTCTGTGCTTCAGAACATCGCGGTCAATCTCTCCACGCCAAAGGGGACGGTTCCCTTATACCGGGAGTTCCG  
CCTTGACTGGAAGTACCTCGACAAGCCAATGCCGGTGGCAAAGGTGCTGATGATCTCCGAAGTGCGGGAGGCC  
GTGGAGCGTTGGGAGCCCCGGGCCACCGTTCTGGATGTGTCCTTTACGGTAGACCCGGCACAGCCCGGTACTC  
TGATACCGACAGTGGAGGTGGAATAAGCCTTGAGTAGAAACGCAGAATATCAATTTGTCCCCACGGACACAT  
CGACCATTGAGGCCCTGCTGGTGGCGCTGTGCGAAAACTGACCGGGGCAACGATCCAGCCCGGGAGCCCTGA  
CCGGCTGCTGATCCAGTGGGTGAGCAACATCATCGTCCAGGAGCGGGTATGAACAATAACCCGGCAACCAG  
AACATCCCTAGCCGTGCGGAGGGGGAGAACCTGGACGCCCTGGGCGAACTGTTCTTGAGCATATCCGCCCGG  
CGGCAAAGGCGGCAACCTGTCAAATGCGGTTCTCCATCTCCGAGGCGCAGGAGTCCGCCGTCTGATCCCCGC  
CGGTACCCGCATCACCGACGCAAGCGGTACGCTCACCTGGGAAACGGTCAAGGACGTCTATGTCCCCTATCGGG  
GAAACCAGCGTGGAGACCCAGGCCCGGTGCCAGATTGCCGGCACCGCCGGCAACGGCTATTCCGCCCGGCCAAA  
TCAACGCCCTGGTGGATCTGTACGACTACTCTCGAGGTGCACCAACATCACAGAATCGGACGGCGGCGCCAA  
CGAGGCGACGGACGAGGAGTTTACGAGCTTATGAGAGCATATATGGACGGCTACAGCTGCGCCGGGGCCCCG  
GGGAGCTATGAGTATTTGCCAAGCAGGTGAGCACGGAAATCGCCGATGTTGTGGCGAACTCCCCGACCCCTG  
GTGTTGTCAAGCTCTATGTCTCATGGACGACGGGACAATCGCCACCGAGGAGATGAAAAAGGCGGTGCTGGA  
CGCTTGACGTGAAGATACCAAGCGCCCCCTGACCGACCGAGTATTCTGAGGAGTACCGAGGTGCTGCCCTAT  
GACATCAGCTTTACCTACTACCTCCAGACCGGGCGCACCAAGAGCGCGGCGGAGGTGCTGCGCGGTGAACG  
AGGCCGTGGAGCAGTATAAGGCGTGGCAGCACGCAAGCTGGGCGGGACATTAACCCGGACGAGCGGAGGGA  
ATATCTCTACCAACCGCGCTCAAGCGCATCGACCTTGATATCCCCGGCCTTTACCGTCTCCGGGACGGCAAA  
AACAAGACCGTCCCCAGGTGGCACGGCTGGGAACGGTGACGATCAAAATGGGGGGTATGAAGATGAATAAC  
AGGGAGCCCCGGCGCCGGCCACGGGCTGACCAAGGAAAACCTCGTGGCAACGCTCCCTGTGCCCCTGCAGAAAG  
ACCCGTCCGTGGTGGCGCTGGCGGAGGCCTTTGCCGAGCTGCTGGCCCGGCGCCCCGGAAGAAATTGACCGGCT

GAGGATCTATCCGGCCATCGACCGGCTGGACGAACGCCTGTTGGACATACTCGCCACGACTTCAAAGTGGAC  
TGGTGGGACGCGGACTATTCTGTTGGAGGAAAAGCGCCGACGCTGAAAGACAGCTGGCGTGTCCACAAGATAC  
TGGGCACCAAGGCGGCGGTGAGCGGGCTATCTCCGCCATCTATCCCCACACACAGGTGCTGGAATGGTTTGA  
GTACGGTGGGGAGCCGTATCACTTCCGCTTGGATATCAACATCACCACGACCACATCGACTCCGACAAGCAG  
CGCCGTGTCTTGGAGCGGCTGAACTACTACAAGTCCCTCCGCTCCCACAACGACGGGGTGACCTACTTTGTGG  
AGGCGGAACCGGCCCTTGCAAAAGCGGCCTCCAGCGTTCCTCGGTTTTCAAAGAACTGTCCACGTTCCCTTGA  
GCTGCCTGTGCCCATCATCCGGCCACAGCAAGCGCCGTGTGCGGGTTATAACCGGCCTGTGGGAGAGTGCG  
GCGACACGGCTGGAACCTTCTACCCCATCATCCGGGGTGTGGCTATGGCCCGCACAGTCGTCTCTACTGGCC  
TCTATGAGACGTTTTGCCGCAAGCCTGGATTTGACCGTCCCCGCGCCGCGGGGTGTCCCTTGCCCGCATCGG  
AGCGTCGGCGGGGATGCAGGAGATTTTTGTGCGCCGTGTGCTTCTGCCTGATACAGACCCGCGGAGGGGTACG  
GCGCACTTCCGAACCGCCGTGTCCAGCGCATGGCAGGAACGCTACACCACCGGGGCGATCCCCCTTACAGCAC  
AGGCACCAACCGCCGCGCTTCAGCTCCGGCCCCGGGGCGCGGTGACGGCGAGGCAAGAAACCGCACAGACCAT  
AATCAATCTTTAGCAGGAGGTAGACCATGGAAGAAAACAAGGCAACGCCGCGTTGGTCGAAAACGGCAGTAAC  
CGACATTGGCACGGCCCTGCTGGCCGAGTTCGACGCGGGGCGCATTTCTGAACATCACCGCCGCATACGGTTCC  
GTCGGCGCAGACGACAACCTGATCGAGTTGGAGGAGCTGCCGACGGCCGCGCCACCCGCTGACCATCGAGA  
GCGTCACCCGACGAGACAACAGTGTGACGGCCTGTATCCAGGTGACGAGCCTGGGCAATCCGGCCCCCTACAA  
GATGGACAGGATCGGCCTCTACGCCATCACCAAAGACCCCGGAGAGACGCAGGAGCCGGACGGCCCCGGTGGC  
GGCGTCTTTTTGGATGATAAGCTCCTGATGGTGGTCGAGGACACCGAGGACGAGCAGGGCCGAAGGGTGTGA  
CCATCCCTGCGGAGACCGACAGCTCTACACGTTCAAGCTCTATGCGGTCTTGACGATCACGAACAAAGACCG  
CCTGGAGGTGAGCGTGTCCACCGCCGGCATCGCCACCCCTGGGGGCCATCGACGACGCCATGGAGAAGCACAAC  
CAAGACCCGGAGGCCACCCGGGGATGATGGAGAAGTTTTGCCGGGGAGCATAATGACGACCCGGAGGCCACC  
CCGGCATGACGGCCCGCATCCGCGCCACGGAAATCGCCCTGAACGGGAGTGAGACGATCCTTTCCAAGAACGG  
CGACCCACCACCGAGACGGAGGGCGTCAAAGGGCAGCATTACATCAACCTGGATACCGGGGTGAGTTGCTC  
TGCAACGACATCACGGACGAGGGCTACATCTGGGGGCCGTTGACATCAAGACCTCCATGCGGGATCTGCTGG  
CGCAGACAGCGGAAACCGCAAAACAGGCAAAGGACGTGGCCGACGGCGCAGCGCAGGCTATCGCCGCCGTCCA  
GAACACCATTTCCGTGATCCCCCTCCAGTCCGGCAGTTTGACCTACAACGGGAGCGCCCAAACCTCCGAGCTGG  
AACAACTACGCTGTGAGATGATGGAGGTACCTACGGAGATCCCGACGACCCGGATGCCAGGATCACGGAGG  
CCAATTTCCAGGGGCGACTGACGCGGGCACCTACACGGCCTACTTCAAGCCCAAGGGCGACTACACCTGGGG  
CGACAAATCCAAGACGGAGAAAAGCGTTCCGTGGAGTATCCAGCGGGCCACCATCACCACTGCCCCCAGCGTG  
ACCGGGACGCTGACCTACAACGGCGGGGCCAGACCCCCACATGGCAAAGCTTCAACT  
>MP\_1\_3\_23\_S3\_clean\_1\_49292 flag=0 multi=63.2845 len=6036  
ATGCGCTAAACAATCCCCAGACCACTCAAACATCCACAATCCGAATCAACATGACTGACTTTTTGCATCTCCC  
TTTGGTGGAAGTCTCAAACCTTCTCGTAAGGGGGTTCGGTGGAGGAATATCTCGCCGAAAAGGAAGCCAACGCT  
TCCGCACGCGCGTTACCACGGCAAACAACGAATGTGAATCACTTGACATGAAGGGGGCTTTGGAGTTTCTCA  
ACGCCAACGGCTACCCGATAAAGAAAGGACAGCTCTACAAGGAAACGAGCGCGGGAACCGTGCCGTTCCAGAA  
ATTCGGCTCCAAGCTGCATTTAGAAAATCCGAGCTGTTGCAGTGGGCGGAGGCACGGCTCATCGACGGAAC  
GCTGTGCGCGTACTCGTACCCGCCACAATCGTGAAAGGAGGGAGGCGATGAAAAAGAAAGAAAGCCGAGA  
AAAGACCTCCCGCAATCCCTTTCCCTTGATGTCTTCCGAGAAAGATGCGTGAAATCATAGACGAGGCGAAC  
ACGACCTCGGATTTCTAAAGACTATCTCGCCATGTGATGCTGACGGCGGTTGCCGCCGTGTGCGAAACA  
CACACAACGCCGAACATATGGCAGGGTGGCAGGAATACTGTATTCTTTTCGTGCACTCGTAGGGCGTCCGGG  
AGCCAACAAGAGCCACCCGTGAGCTTCGCCATGCAGCCGCTCATAGATTTGACGCGGAGCAGTCTGCAATC  
TTCTCCGAGGCTATGAAACGCTATCTCGCGCGATGGAGCTGCCGCCGAAAGAGAGAGCCGCAAACGGCTATG  
AAACAAACCCGACCGAACCGAGGCGCGTCCGCTTCACTATGCAGGATGTAACGCCGGAGGCGGTACACCGCAT  
CCTTTGAGAGAATCCGAGGGGGTGTGCCTCTATGCCGACGAGCTTGCCGGGTGGTTCAAGAATTTCAACCGC  
TACAACAACGGCTCCGAATCGGAGTTCTGGATGTGCGGTGTTCAACCACAAGGTAGCAATGTGACACCGCAAGA  
GTAGCCAGAGCGGTGTGTTTCATCCGCAATCCGTTCTCTGCGTCATCGGCACGATCCAGCCCAAAGTGCTGGG  
CGAGCTTGCCGCAGGGAACCGCAATTCAAACGGTTTTACCGAGCGTTTTCTCTATGTGGTGCCTGACGACAG  
ACAAAGGCGAAATGGAACAGCGAGAGAAAATCGCCCTCATTTGACATCGTTTTGCGCGTGCGGTGAGGTTGTG  
GCAAAATGACCGGACTGTTCTGCGGCTGACAGCGGAGGCGACATACTGCCCGAAGATGTGCCGTTCTCGCC  
GGACGCACTCCAACGCCTCTACTCATGGCAGAACGAATCGACCGAGCGGTGCAATGCCGATGGGAGCGACACG  
CTCACGGCGATTGCGAGCAAACTTGAAATCTATGCCGTGCGGTTCTGCCTTCTGCTCGCCCTCTCCGACTGGG  
CGTGCGGGGCAAAAAGAAAGAGGCGATAGAGGCGGCGACCGTTGAGAGGGCAATCCGTCTGACGAGTATTT  
CCGGGTAAACGGCGACAAGGGTGACGGGCATCATCGGCGAGGACGCGCTGACCGATGTGCACTTGCCGTGATG  
TCGGAAC TGCCCGCCACGTTCAACACTGCGAGGGGAGTTGCCATAGCCGCGAAATGCGGGATGGCGGAACGCA  
CCTTCAAGAAATTCCTTTCGCGACAGACGGGGCGTTTTCTTACCCGTGATGCTTACGGCTCTTATTCCAACT  
TTGAATTTACCCCATGCACACCTTGCACTTTTGACACTCCCGACTGTGCAAGAGTGCAAGGAATGCACGGGG  
TTATCCCTGAATTTGAAATGATGACAACAGAGTTTTTTCTCGGTGTACCACTATACCCGTTACAGTGGTTTAC  
CGCCAGCGACCCATATCCGGGGAGCAGTCCCATCCGTGCTGCCGCGCACGGAAATTACAGCCATGCGGGAAA

GTCTTAGCATATTAGGGAATTTTCCGAGCCGCATATCGTTCCGATACGCTGAAAAATATCCCCAATATGCCAA  
AGGGTGACCTCCCTTTGGAAACCCCGGAACGGCTTAACAGAAAGCCGTACACTCCGATTGCTCCGCAACTTAA  
ACTCGTCCGCCTATGAGCTACGCAGTGTTCACATCATCAAGGCGAACTCGTCGCTGAACTCGATAGCCAAGC  
ATATCGAGCGCACCTCCCATCCCGAAAACGCTGACCCGCGGAGGACGCATCTCAACCGCTACAATCTGGTCTGA  
ATATCCCGACGGGATAACAGGGCTTGCGGCGGCTGTGGAACACCGCATAGCCAATGCAGGGATTACCCGGAAA  
ATCTCCGACCGTCAAGTCCGCTGCCTAAACATGGTGATGACCTCCGACAACGAGGGTATGCAGAAAATCATCG  
ACGAGGGGAAACTCGACGAATGGATTGCTGACAACATCAGATGGGCGCGCGACACATTCGGCGGCGATAATGT  
TGTCGGAGCCGCACTGCACATGGACGAGCGCACTCCGCATCTTCACATCGCCGTCGTTCCGATAGTGACCGCC  
GAGAGAAAGAAGAAAGCGAGGGAGGCGACCGCAAAGAAGCGTTACCGCACTAAAGCCGCCAACCGTCCGAGGC  
TGTGCGCCGACGACATAATGGAGCGCGGAAAGATGAGCGGATATCAGGACACCTATGCCGAGGCTATGGCGAA  
ATACGGTCTGGAGCGTGGCATCCGAGGCTCCGAGGCGCGCCACATCGGGCAGCACGAATATTACCGCGACTGC  
ATGGTGAAGAAGAAAGGTCTTGAAGAAGACATCGGCAATCTCTCCACCGAGAAAAGAAAGCTCGACAAAGAGA  
AAAAATCGCTGGAGAGCAAGGTTGAGAACCTTGAGTGCCGACAACCGCCCTCGACACTCGGAAGAAAATGCT  
CACGCAGGTCAACGAGGAGATACGGCAACAGAACAACGAACCTCTATTCCGAAAACACCCGGTTGACCGAGGCT  
AATTCTTCTCTCGCCACCGAAAACAAATCGCTCATGGCGACATCATAAAACCTCTCCGATGATGTTGTCCGGC  
TGCAAATGCAGAACTCTCCAACGAGGCAAACGAGATTTCAGAAAATACAAGGCTGACATAGCCCGGTATTT  
CCCTGACCTTGAAGATTTGCTGAATTGGGGGCGATACTGCACCCATATCGGATTTCCCGACAGATTCACGCAG  
CGCATACTTGCCCAAGAAAAGGTAGGATTTGCAGGAGCCCTTTTCTCGTCGGAACACAATCAGACCTTTTCGA  
CGGAAGGGTTCGGTTGCCAAATTGGAAAGAGATCCGGAGAATAAACACCGTTTTTCATGTTGAATATCGACGGAGT  
GAGCGTCTTTCAATGGTTCCGCAATATGGCTCGTAAACTCCTTGAGAACTCGGCTTCAAACCAAAAGAGCCG  
ACCCAAAGACACACCCGTAATAATTTAATTAACGTGAGTTCGACATAAGTAATCAGAACAACGTGAGTTGCTTG  
TCAGCGACAAATTCCAAAGAGATAGACGGTTTCTTCGGGAAGAAACAATATGCAGCTATTGCACTCAGGGCAT  
TGGTTATGAAATTTGCGAAAGACCGATGTCTTGAGTGTCTATCTGAGCGATGTTCTTAAGTTCGTCAATTAAC  
AGATTCACCAAAGCCCTTTTGCGAAGCATAATCTTGTGCGAAACAGACATCAGCGAGTTCCTCATGTTGTTT  
TTGACTTTTGTGATAAGCTGAACTCCATTCTGAACAGAACTCAAACAGTTGCTTGCCGATATATCCTTTAT  
CTCCACAGAGCTTGCCCTTTACATTTTCAATAAATGACTCTGAATACAGAGGCTGACGGTTCATCGACATTGCC  
CGGTGTAAACATAAAGTTTCAAGATCTCACCTTTGTCAATTGATGATCAGGTGCAGCTTAAAGCCGAAGAACCAT  
CCCATCGAGCATTTGCCCCGCTGGGCTATACCTTTGAAAAGTCTTGTGTATAAGTATGCGTTGGTGTGTTGCAAA  
CTCTCAACGGTGTGTAATCAACATACGCAATGCCGGAACAAGTCCCAAGCAATACTTCTTTGATGAATACCGT  
GAGTGACAACAGCACGGACTTTTGCAATTCAACAAATCTGTTGTAGGATACTGTCTTGGGGAACAAGTGCCTA  
AGATGCTTGCAGACATACTGCATGTAAAAGTGTGTTGAGGCATCGGAATCCCTTACTGTGAAAAAGAATCAGAA  
TGGTAATGACCTCGGCATCGGAAAGCCGTCCAGCTTATTGCGATGCTTCCTGCCATCACTGAGCTGATACTT  
TTTGAGTTTCAAGAAAAAATACTTGCAGAAATCATCGGCAAGACAGAAAATTTTCAAGTAATTTTGTCTCGGTA  
ATCATAGCGCAAATTTCTGTAAATCTTGCAATTAGGCACTGTAAATTTACGGTTTTTTTCGCGAGAATGCCAAG  
AAAATCAGCCATTTAGTGTAATACTAAATGGCTGATTGTTTTATTGGTGAATGGTCTATTGCTTATATCGAAC  
TCACGTTAATTACTCAATAGCGACTATCATTGTTTTTATCAGTGATAGCCGCTATTATTTATAATTATTGACA  
TAGTTCTACTCGGACACGGACGTTGGGCGGCGTTGCAATTGAATGAAAATAAGCTGCTCCATAATCTTGTGGGT  
TGTGGTGCCACAAAATTATGGAGCGAGTATACGGGTGCAAAAGACGCGGCTATTACTCTAAGCAGATAGCTTC  
GCGTGTAGCATAGATGGGTGCTTGTCTTACAGCCTATTGCAATAAGTTCAAGTATGTCAGTTATTGCGCCC  
TCTTGTGAAAACCTCCTGTATGAATATATGCCCCTTTCTTTTGCAAAAATAACCCAAATTTACGCCATCAA  
CACAAGGAATTTCTTTGAATGGTTTTGCGGTATCAACTATGTTTTGGAGAAATTGGGCTATGGCTGAAAAATC  
GGCTGGATTTTCAATTTTCAAGCTTGTATTGAGCATTAAATACCGGGGGCTGCGGTCTTCTCCATTATCACGA  
GCTTTATTGTATTCAATAAGCCAGGATAGTATGGGTTCGAATAAATGCGATGAACAATACTATCACCATTGG  
AGTAAAGACTAACGCCCATATCATAATCTTCAAGCCCGATAACCATAAAACCATAATCCGGCACACCGTCCAA  
ATCCAATAGAAAATGTTTCTCTATTTGAAAGAGTTCGTTGTCAACATTTTCAAGCGGTTGCGCCTTTTGTGTT  
GTGAAGCCAACAAAAGAGATTGTCATAGCGATGAAAAGTAGCGCGAGTTTCTTCATAATCGGAAAGAGTTTGA  
GTTATTTGGAGAGAAGGACGCTTATTATTAGTAGTTAACAAGTTCTAATCCTCCGAATACCGCAGTAACCTGC  
AAATATCCATGAAAATATTGAGGGTAAAATAGAAATATAGGAGGGAGCTTTACCGTATAATTTCATAGAGCCA  
ATAAGGCCCAAAATGAACCATATAGAATATGAGTTTACAATAATCCACGCAATCGAGGCCAAATCAGGATGCT  
TAACTCTATCCATAAAGAGAGAACCATAGAATACAAGAGGGGCTGCAATAATGGGAATGGCGAAAAGGAAAGC  
TGCCACAAAAAACCATTTGGCTACATTATGTTTTTCAAAAAATGTTTGGCGAAAATATATATACCGACTATT  
GGCCCAAAGAAAGCTAAAGCCATAATGGTAATTAATAAATAATGCTGATATTTGTGTTTTCCATACGCAAAG  
TTACACAAAATCGGCGAGATACGGGGTATAATCAGAGGAAAACCTTCGAGCGCAAAATCAAACTTCTCTCCC  
AATCTGCAATTCAGAGCTTCAAACCTATGGCAACTTAGAGAAAAAGAATCAAAATAAAATATAACTAACGCTC  
CTTAAAAATCCATAAACCCCTTTATTCTATTTCTCTAATTATCGCAATAAGTACATTTTTAGTACACTTATA  
TTATACTTATCTATTGATATTGAGCATTATAAATACTATACATCAAAACA

>MP\_1\_5\_10\_S46\_clean\_1\_220871 flag=1 multi=3.0000 len=5096

GTATGTGGCGTTCAAGTCCAAGCGGGACAAGGATGACGAGGAACAACGGCTGGACAAGGCGCGGCGAACTGCC  
GAGGTAACGCTGCGGGCATCCAAGGCCAGATAGCCAAGATGGAGGCCGACGAGCTGCGGGGAAGATGCACC  
GCAGCGAGGATGTAGCCGCCATGACGGAGGATTTGATTTACACCATTTCGTGGCTCGCTCATGGCCCTGCCCGG  
GCGGTTGGCTGTGGACGTGGCTGCTGTGGCCACGCCCGCGAGGCCGCTGAAATCATCCGTAAGGAAGTCCAC  
GCCCTCATGCGGGAGCTGGCCAACTATCAGTATGACCCAGAGAAGTACGAGGAACGGGTGAGAGAGCGGAGAA  
AGTGGGAGGCTGGCGGCGGTGATGTAGATGACGAGTAAATCCGCTACGCGGCGTTTGAACGGTGCAATCGCAA  
AGGCCCTGGCCGGGATGAAGCCCCCGGACGATCTGACCGTGACCCAGTGGGCCGAGCGTCACCGGCGGCTGTC  
CAGCGAAAGCAGCGCAGAGCCGGGACCCTGGCGAACCAGCCGACACCGTACCTCCAGGAGCCAATGGACGCA  
TTCACTGACCCGAAAGTGC GGCGAATTGT CATGGTGGCTGCGTCCCAGGTGGGAAAAGTCGGAGCTGGAGCTGA  
ACATCATCGGTTACATCATCGACGAGGATCCCGGCTCCATCTTTGTTTGTCCACCCTACCACCATTGACGCAAA  
GGAATTTTCCAAGCTCCGTATCGCGCCGGAATCCGGGATTGCCCCACGCTGCGCCGGAAGGTGGCCGCGCCC  
AAGAGCCGGGACAGCGGAAATACGCTGCTGCAAAAGACATAACCCGCGGCTATTCTGACCATGTGCGGCTCCA  
CCGAGGCCACGCCCTGGCATCCAACCTATCCGCTATGTGCTGGGTGACGAGCGGGACCGCTGGGCCACATC  
CGCCGGCAATGAGGGCGACCCCTGGGAGCTGGCCATGGCCCGCCAGACCACGTTCTATAATGCCAAGGCCGTG  
GAGGTCAGTACCCCCACCATCAAGAATGCCAGTGCAATCGAGGCATCCTACGGAGAGGGTACGATGGAACGCT  
GGAAATCCAGGTGCCCCGACTGTGGGCAGTACCAGAAATCCAGTGGGAGCATATTGATACGACTACGAGGA  
AAGCGTGGTCAATCACAAGAAGGTCTACAAGGTCAAAAGCGTGTGGTACAACCTGCCCTGGCTGCGGCTGTATC  
TCTGACGAGGCCACAATGAAGCGGGCTCCCGCCCGCTGGGAGGCGGAAAATCCCGCCGCCTATGCACAGGGCG  
TCCGCTCGTTCTGGCTCAACGCCTTTGTGACCCAGTGGGCGAGTTGGGCTTCTATCGTCCCTCAAATATCTCAA  
CGCCATAGGGAACACCCGGAAGCTCCAGGTGGTCTACAACACCTGTTTTGGGCTACTGTGGGAGGACCGCGGC  
GACCTGGAGGACGAGGACAGTCTGATGGGGCGGCGCGATGTCGAGCCTTACGGCCTGGAAGAGGGCGGGACGC  
CCATTGAGCTGCCTGACGGGGTGCTGGTGCTGACCGCTGGCGTGACACCCAGGACAACCGCATGGAGTATGA  
GGTCGTTGGCCACGGACACTTCGGGGAAACCTGGGGCATTGAAAAGGGGATCGTCATGGGGCGGCCCGATGAT  
GACGAAACCTGGGCCAAGCTGGACGAGGTTCTGTTTAAACCGGGTATTCCGCTTTGCGGATGGGCTGGGCCTGC  
CGGTGTCGCTGACCTTTGTGGACCAGGGCGGCCACTTCTCCGGCGAGGTCCGGCTGGCGTGT CATGACCGAAT  
CCGCAAAAAGGTGTTTGC GATTATGGGCTCCAAAAACACGACGCACCTTATACGAAACAGCCCAAGGAACAA  
AAAATCATGATT CAGGAGCAGTATCTCGGGACGTGCTGGATGTATGAAATCGGCGTCGACGCGGGGAAGCAGC  
GGATTATGGAGAATCTGCGCGTT CAGACCCCCGGCCCCAACTACTGT CATTTCCCGCGCCGGGATGACTACGG  
CTCCAGCTATTTGCGCGGTCTGCTGTCTGAGCGGCTGGAATATGACGCGAGCAAAAAGCAGCCCTGGGTATGG  
AAGAAGATTCCCGGCCATGAGCGCAACGAGGCCCTGGACTGCCGCAACTACGCTATGGCCGCGTTCAAGGCTT  
TGCCTAAAGACTTG GATGCCATAGACAGGCAGCTTAAAGCCATGCGGGGCCAACGCCCCGACGCGGCTGTTGC  
AACGCCACCAGCGGCCCCCGCAGCGCTCGGCCCAAGGCTAAAAAGGCAGGCTCCAGACTGAACGAATATTTT  
GACGATTGGTAGGTGGTATCATGGCAAGTGCTGTTGAGCTGAGGGCGCGGCTGGACTTCTGGCAAACCGCACT  
GAAAAAGCTGCGCGAAGCATATCTCGCACTGGTGGATGGCGGCGTCAAATCGTACATGATCGATGACCGCCAG  
CTGACCCGCTTTGATCTCCCTGCGCTCGAAAAGCAAATTGAGGAAGCGGAGGCCAAGGTGGACGAATTGGAAG  
AGCTCTTGAATGGTCAGAGGCCCGCTCGGGCTTTTGGTGTGATCCCGAAAGATTGGTAACTGGGTAATTGCCC  
GAAAGGGCTTTACCGAGGGTGGCCCGGCTGGGGTTTGTTCGCTCCTTTGCGCCAGCTGGGCCACCCGCTTTTAT  
AGCAGCATTGGAGGTGGACGCTATCTACTACAAAACCAAATCCGGCCTGCTGCTCCCTGACAATGCGCGGCC  
CAGGGCAAGGGATACAGCGAGGCCGGAGCCAGTCTGACCCGGCGGGGCCATAAAAGGCTTCACGCCGCGCAGCG  
GCTCACCGAACGAGGACATCAACTGGAACAACGCCACCTGCGGCAGCGGGGGCGCATGCTCTATATGTCCGC  
GCCGTTGGCCACGTCCGCCGTGAATACCAACCGAACCAAGGTTGTGCGTGTGGGCCTGACACTGAAAAGCGCC  
GTCAACCGGGACTTGCTGGGCCTCTCCCCGGAGGCAGCCAAGGAGTGGCAGAAGCGGACGGAGGCCGAGTTCC  
GGCTGTGGGCTGACCGAAAACAGAGCTGTGACGCTATCGGCATGAACAACTTTGACGGGCTGCAGCAGCTCTC  
CCTTGTGTCGTGGCTTATGTCCGGCGATGTGTTCCCGGTGTTCAAACGATAACCCTGCCACGCCTATCAGCCCC  
TATTCCCTGCGGATCCATCTGGTGAGGGCCGACCGGGTGAGTACACCTGACCGAATGGGCGGCGGCGTGGGCT  
GGCCGGGTATCACGGATGGGGAGAACTATCAGAACGGCAACAAGATTTTTGATGGGGTAGAGGTGGACAGGAA  
CGGCATGGTTCGTGGCCTACCACGTTTGCAACAACCTACCCCTGGCAGATCACCGGCGACCCAGCGTGTGGACG  
CGGGTGGAGGCATACGGACCGCGTACCGGCCTACCCAACATCCTCCATGTGATGAACAGCGAGCGGTGCGACC  
AATACCGGGGCGTCACCTATCTGGCCCAGGTAATTGAGCCGCTGCTGCAGCTGCGCCGCTATACAGAATCCGA  
GCTGATGGCGGCACTCATT CAGAGCTTCTTTACTGCGTGATCGTTACCGAGACAGACCCGAGCAAAATTCCG  
CTCAACACGGTTGGCGCGAGCGGCATTGTTGGCATTCTTGGGGCAAATCCAGATGAAAACACCATCGCCGATG  
ACCAGAATGAGTACGAGATGGGGCCGGGTATCGTCACGCATCTCAAACAGGGGGAGAAAATTGAGTTCGGAAA  
CCCCAACATCCCCACCACGGGTTTTGATGTTTTTATCAAAACGTTCTGCAAGCTGATTGGCGCGGGCCTGGGG  
ATCCCTATGAGTGCTGATCAAAGAATACAATCTCTCTATTCTGCTCCGCGCGGCTGCGCTGCTGGACGCAT  
GGGAGGATTTTTCGTATGCGCCGGAAGTGGTTCTGTGGACAATTTCTGCCAGCCCGCTATGAGGTCTGGCTGGC  
AGAAGCCGTGGCCCGTGGGCGCGTCAAGGCTCCGGGCTTCTTTGATGATCCCCCTTATCCGCGCGGCATGTGTC  
GGGCGCGGTGGATCGGGCCTACCCAGGGCAGCCTTGACCCACTGAAAGAGGCCAAAGCGGCGAGTGCTGCAAA  
TTCAGCACGCGCTTAAACCCATGAGCAGGTACCCCGGAGACGGGCGGCGGTGATTGGGATGAAAACGTGGA

GCAGGTGGCAGCGGAGAACGCGAAACTGGCTTCCGCTGGCGGCGGGGTATCCGCATGGAAGTTGACCCCAAC  
GAAAAAGACGATGACGAAGGAGATGGAGACAATGCCTAGCCCGTTGGAAATTATTTTCAACCGCAACCGCAAG  
CCCAAGGCGATCAGTATCAACCGCGGCCCTATGTCTATGGAGATGGCAGACGGGGAAAATGCGGAGATCACCA  
TGTACGGTGAGATCGTGAAAGGCATCCGAAGCACTGGTGGACTGGCGAGCCGTTGGAGGGCGACTTCATCGT  
GCAGGATGAATTTCTGCGCGACCTGGAAAACCTGTCCGGGGCCAAGACGCTGACCATCCGTATGCACAGCATT  
GGCGGTGATGCCGGAGTATCTATCCTGATCCACAACCGCTCCGGGAATTGTCCGCCAAGGGAACAGCCCTGA  
CCTGTATCGTGGACGGCGTGGCTATGTCCGGCGGTTCTGCTCATTATGTGCGCCTGCGATAATGTGGAGGTCAA  
CCCCTCCAGCCTCGTTATGATCCACAAAGCAGCGATCTCGATTGAGGATAGCTGCAATGCGGATGAACTGCGG  
AAACACGCTTCCGCTCTGGACGCATGGGATAAAGCCCAGGTGTCCATCTACAAGCGCAAGGCCCCGGGGCTTT  
CCGATATGACGATCTCGAACATGATGGCAAAGACAACCTACATGACCGGGACGGAGGTTGTAGAAAAGGGCTT  
TGCCAATAAGCTCCTGGAGGACGCGGAACCGCTGAACATTGCCGCCAGCGCCGACGGGCGCAGCCTGTTCTG  
CGCGGGCGGCAGGTCCACCTTATGCCTGGGGTATTCCGCCCCGACACGATCCCCACGGT  
>MP\_1\_5\_14\_S33\_clean\_1\_200524 flag=1 multi=22.9063 len=7753  
TTGATGAAGGAGCCCCCTCATATTCCTATCTGATGCTCTTGTATTATCTTCATTCTTTATCAGTTCCTTTCT  
ACAGGCAATCAAAAACATTAACAAGCAATAAACCAATGACAGCATGAAACGGATTTTAATTATGACGGCAT  
TTGAAAAGGCGCGTGAGTTTGACCCATTCCGGGCACGCGGATTTGACCCCTCGGGCATAATAAGATTGACCC  
CTTAAAAGTCCTGGCGGCGGGGGTCAATTTTATTTTACCTCAGTTGTTGTTTCAGGCCTTTTTTCGCCTTGAGT  
TTTTCGCATACTTTTCGCCTGTAAGCTCGATTGAGTGCCTGAGTGGACTATCCGGTCGAGGATTGCGTCGGCCA  
CCGTCGGGTCTCCCACCATGTCTGACAGCTGGATGACGGATACTGTGAGGTGATTATGATGGATTTGCGCTC  
GTGACGGTCCTCGATTATGTCCGGCAGGATCGGTGCTCCTTGAGTTCGAGCCGGACAAGGGACAGGTGCTCG  
AGTATAAGAAGCTGGCATCGTTCTGATTTTCTTTAGCTCGGCCTCAAGACTGTTCTTGACCTTGGCCACCTTGA  
GCAGCCCGAGAAGCTTGGCTGCGTTGGCGCAGAGTGTGCGTGTGCTTCTTCTGCAGGCCTCGTGCCCCAGGGC  
ACAGGCAAGGAAGCTTTTGCCCGTGCCGGCAGATCCTGTTATGAATAGATTCTGTCCGTTGCGGATGAAGTCA  
AGGGTAGCCAGACGTTCCATCTGGTTGCGGTCAAGACCGCGGTGACCGTATAGTCGATTTCTCGAGGTATG  
CCTTGTAACGGAACGATGCGTTTGTGTCAGTCTTGTCAACCGTGCCTGCGCGCGGTAGTCTCACTCGCGGCT  
GAGCAGCATGGACAGGAAGGAGTCCGGGGTCATTGCCTGAGCAGTGGTTTCTGCCAGACTCTCGCGGAAGGCC  
TCGGCCATTCCGTGCATTCTATGCGGTTCTATCAGATCCAGCGATATGGCGTTCTGGTCCGGCTGCTGGCTCACC  
GGCGCTGTCTTGTCAATTTGTTTTTCAATTGGAGTTGTCTGTTTTTACGTTTTCTTTGTGATTGACGCTGTAGTAT  
TCGCGCCCCCGATGTTTTTGTGCACAGGCGCGGGGGATGATGACACCGGGGTATGGACTGTCCCGTCTCTCGT  
CGGGAAGGAAGTCGGCGTCATCGCCCTGTTCAAGGACCTCACGCAGTGCCTGATATCCGTATTCGGATTTCTG  
CGAGGCGCATACGCATCCGCCATGAGCCGGTCTGTCCCATATTTCTTCTCGAGCGACAGTATCCCCCGGCAGC  
TGCTGAAGGATTTTGGCGGGTACTGCATCCGTCTGTCCACTTCCCGCAGGTAATCCAGAACGATATTGTCCAT  
CTCCGCCGCACGTCGGAAGAGTTCTTCGAGGTCTTGTGCTAAGGGCTGTAATGACCGGGCAGGTTGTGCTCC  
TTCTTCCACGAGTATGTGTAAGGGATGTGCGATCTGTCTGTCGTCGCCACGAGGTTACAGCCGCAATATGTCT  
CCACTGTGTCCGCATCGTAGAGGATGACCACACGCTTGCCACATGTTGCGGGGACGCTGCAGTGGTGCTTG  
AACAGGGATACGTGGCAGTTCTTGCCGACTGTCATCAGTTTGCCTTCTTCATGACAAAACAGTTTCTCGGGCA  
GGGGGCGGAGAAAGTCCTTCTCCCCGCGAAGGAAGATGTCACGGCGCGACAGTTCACGGCCGGCCATCGGCTT  
CTCGTTGAAGTCTAGCAGCGATATGTGTATCGCCGTGTTACGTCATCCAGAGAGTTGAAAACCATTCCTCG  
ATATCAAGATAGACTGAACGGTACAGGAACCTTGACCGGTTCTCGACAAAAGCCTTGTCCTTGGGATGGCGCA  
CACGCGCAGGGTATACGGCACATCCGTAGTGTTCGGCAAAGGCGGCAACTCTTCGTTGATAACCGGTTCTGTT  
GCGGTGCTGGTCTTACCGCCGCCCTTGAGATTGTCCGGAACGATGGCCGCCACAACACCCCCGAAGTACTGA  
AAGGCGTCTGACAGGCCTTGATCAGGTCTTCTTGCCTGGGACCATAACGGCCTCGCAGTAAGTATAATGAC  
TGAACGGAAGTATGGCCACGAACATCTCGGCCTTCTTGACCTCGCCCGTCATCTCGTCGACAACCGCGAGTCT  
GTGCCCCGCGAAGTCGATGTACATCTGGTCCGGCGGCTAGTGTCTGACATGACCGACGACAGTGGTATGGAAT  
CTGTATTGCCGTGACGGCGCGTTGAACACAGATTCTGAAAAGCCATCGGTATGACCTTCCAGATACTCATTGA  
AGAGCTTACGCACGGTCGTTCCCTTGCGTGAAAGACGGGCGACATAATCCGGTATCAGCGCATCAAGTTCGAG  
CTGACGCTGCGAAGGCTCGCGATGCCGGAACCTCCGTGCAGCCGAACATCTCACGGAGCTGTTCTCCTCGTAAGC  
TCAAGCAGTCGCTCTGTCCGCTTGTGCTTGAATGAACAGCCGGACAAAGAGCGCATCTTCCGCTGCCCGCT  
GTTCCAAATACATCTGTATCGTTCTTCTGAAATGGTCTGTGTTTTTATATCGCTGTGTTTTATCAGTTATA  
CATTTTTCCGTTTTCCCCAAAACCTCGTAGTCTGTTGGCTGCGCAACTCTCCTCGAACTCTCCTCGCTGCACTGG  
TATTCATATCGTCACGGCACGACTTGAAGAAGCTGTCAAGGCACCTTGTCCATGAGGTCGTACAGAGTGATT  
GGGTGTCCGGTGCTTTTCAAAAAGTCGTAGATGGGTGCAAGAATGTCCTCGTCTGCGCAATAGCCTGTGAGTAC  
GCAGCAATTGTCCGTGAATACACTGCTTTTTCGCTCTTTTGTGTAATTGCCTTTGAGGTAGTAGGTTCTCGGC  
TTGAATAGGGTGTGCCAATAATTATTGACGATGTATTTTCAAGCCGTATGCCGCTGAGTTCTCTTCTCTCTC  
CGCTGTAACGTGAGGTGAAGCGGTAGGAATAACGGCACGTGTGTAACCTCCAATCGTTCACTTTGAGTTTGA  
CACACTTTCAAATGCTTCCAGCGTGTGCGGTTATCGCTGTCCCAACCGTATTCAAAGGTGAGTAACCATTCG  
TTGTATGCGGTATCTCTCGCTGCTGCGGAGAGTTCCGCTAATTGGTAAGGTCGTATGTCTTGTATCGTTCT  
TCATATCGCTGTCAATTTTAGATGGTCTGTTTTCAGTATCTCTCTCCAATAGGTCCGCTCCACCTCGCTCAAAAG

AAAGTCCGTAAAGTCCCTCCGTGCGTCCTTGTTTCAGTTCTCGGTAGAGTTCACAGAACACGGATATGTTGCCG  
TTTATGTACGTTTCCACCATGTACACGAAGATGTTGTCCACCTCGTAGTATCTGCATTGCTGCGCTGCCGTTT  
TGCTGCTTCTCTTTGCCATGTCCGTAGGGGTAAAGGGTGAATAACCAAAGGATAAAGCCGAAGAAGGCGATA  
GTGAAAAGGATAGCCACGATTACGCCTATTGCCACTCGGAACACTCCGTTTACAATCTCTGCTATGATGCCCC  
AAAGGATGCCGAACACCCCGAAGGCGGTGCGTATTATCAAGCCGCATATCGCCAACCCGATGTATTGCGCAGT  
TTGTCTGAAATTTGCCGTTGCCGTCATATCTTCGCTGTTTTTGTATTTTTTAAATGCGGATTCAAGAGCTGAGG  
GAGTTGAGTTTCAAACCTATCTTATCTGCCTCTCGTTTATCCGACATTTTTTTAAATGCGTCTTTCTGTGCGATC  
GGTCGTTTTCGTTTTCGGGTGCTTGAAAAGGTAGGGATTAGGGGATGCAAGGTTGGCTGGAGATTTTTTGCCGAA  
AACAGGAGGTTTGACCTTGCAATCCCGTCCAATCCCGGAATTACCTTTGCGCCCAGAACGGAATGACTGCCT  
GATGCGGCTCACTGAAAGGCGCGCAATGGAGGTAAACGGAAGTGGAGGCAGATTGGACAGGAAAACCTTCAAA  
AGAGAAATCCGTAAAAAAGGGATAATGCCAAAAAGAAAAGGGACACTGCCGGAAGCGTGAAACCGGGCAAACC  
ACCGGCAAGGAAGTATGATTTTATATGTCTGGCCGAGCGTGTCCGGTCTGACGGATAAAATCATTCTTCCCGG  
TTTGCCTGCCGTGTATGACGGCTTGTTCATTTACGGATCGGGCGGTTCATGCGCGGCTTTCCGCTTACGGCTC  
AAAGGAACAGCAAAAAAGAAAAATCGTCAGAAACCCGTAAAAGCACCTCTCTGGCATAAGCGCAAAAGAAATG  
GGCCTTGCATCATCAGTCTAAACTTCTGTTTAGGCGTGAGGCAAAGCCCTTTTCTCCGCTTATGCGGTAGTCG  
GCATACGTTTCGTCCAAAATCTCTTTGTGCGATGGTGTGTCGATGGAGAGAACCGCTTTTACGGAAGATATGAA  
TACGAGTATATCAAAAAATCACACTCGAAACACCGAAAAAAGTAAATCATTGGGGAGTTTGGATAAAAAAGT  
GTACCTTTGCAATAGAGTTGTTAGATGTAGCAAAGCACAGCATACCAGTGAATTTGCATTGTGCGCTAAATCGT  
TACCATAAAATTGAAAATCTCTTATTCTATTCTGACACACAATTAGATACAGTTTTTTTTGACTATCCGGGGCA  
AAGAACCTCCAGAAGCTCGGACGTACTCAGGAAGCACTCTCCATGATGGAAAAATATGCCATTGCCCGCGACA  
GCATCCGTGAATCCAAAAACAAACGAGACATCAATTCCCTTTAAGGTTAAATTTGAAACGGAGAAGAAAGAACT  
CCTTATATCCAAACAGAAAAGGTGAACTCCGGATGCGGGCCATTCTTCTCTGCCTTGTGCTATTTATACTCATA  
GCATCAACTTGCGGATTACATAATATATATAAGGAACCGTAACCGCCTCTTCCGTCTCATAGTGGAAACAGCAAA  
AAGAAATCACACCAGACAAAAATAATATGCCCTTATCTCGACAAGAATCAGGAGATCAAGGAAGGTAAATA  
TGAGGAATATGATAAGGATTCACAAACTATACCAACTATATAAAAGATAAAAAGTTCTGGAAACGGATTGCCG  
TCGCAAAAAAAGGCCGATGCCATCTGGCGCGCTATTCTTTTAGCGATGGAGACAAAACAGGATATATACCGACC  
CGAATGTGACCCGAGACTCTTTTGCTGAAAGAATCGGCACGAACCACACATGGCTCACTGCCATTATAAAGGA  
TCGTACAGGCAAGTCATATACGCAATTCATCAACTCCTGGAGAATAAACGAAGCAGTCAAAATCTGTGCGGAA  
GAAAACTGTGGCTACACAAACAAGGAGCTGTGCGAACTGCTGGGATTATGACTCCTCAATCGTTCTACAACA  
CTTTCCGTCTAGCAAAATGGGAATGTGCGCTGCCCGTTTCCGTCAAGACATCCTCTCCGTATCCACAGCAGATAA  
AACAGAAGATTAGCAGAATGAATAACCGGATTATTGTAAAAATATCCGCAAATTCTATAATGATTACGCCATTT  
GCGATTTGCTTACGCGCTGATACTTTGAACATTTGATTTTCCATCATACTTTTGCTGCCACAGTTTCAGGCACG  
TTGCCGTGACTGAAAAACAGCAATACTCATGAAAACTTTTACAAAGGATTGATCGGGGTACGGCATTTCGTAG  
CAGTGTGCGGCAGCTATCCCCGCAATGTCTGTCGCACTCAGCCGCGACCGCCTCGTCAAGGCAGACCGCCTCCA  
TCAGGAGAGCGAGATTTCCACTCCCGGACAAGTAGCACAACTGCTCATAAAGCCAACAGGACCGGCACACCC  
TATTGGCAGACGGCCAAAAGCATCTACAACGCCGATGGAAAAGACAGACAAAGAGAACGGACTGACAAGAGAAT  
TCGGTACGCATATCGAAATCGATGGCGAGACCGCGAGAATCTACGGACTCGTAGATGTCAACTACAGCAACTA  
CTACGAAATCGATGAGGAATTCGCCGTAGAGGGAGTATATAACGAGCGCTACGGAACAATCACAAATCAGCGGC  
ACAGACTACAACCCGGAACGCCCTCTGTGCGAGTACAACAGACTAGCAAACATCTACTCTCCGGCGGATGATA  
TGGCATATACTGTGCTGCTGATTGTCAGGAGACTGTAATGAAAGAGGTGAAATCAATACAAGCGAAGAGCTTAT  
ATTCGATGTTTCTGATGATTTGTGCGACGTAACGCCCCAAGAAGGCTTACGGAGCATACGTTTACCTCCGAA  
GGTGAAGGGAAAGCCTTTGTGGACTTCTATCAGTCTTCCAGCATACTAAAAGCGCCGGAAGAGCCAGAGCTTA  
AGACAAATGCTGAAACCATTACATTCAAACGCCAGTTCGTAGCGGCAGGAATGCCGGTTCATAGAACAGTTCAA  
CCTTATGAATGCTGGCGCCTCGGATTGCACGTTTACAGTTTCCACATCTTCTCCTTTGCTAAAAGTATCACCG  
GAAAAAAATTCCTTGAAGGTTGTTCCCTCTGTGCCTCTCACAGTCACATTTTACCCGGAAGAGCCAGGTATCT  
TTGACGGAAGATAACTATAAAAGGAGCCGGTAAAACAATTGAAGTGTCTGTAAACACCGAGGTAAGAGAGAT  
CCCAGACTACACACGTATCGTTAAAAGCGGAAGCAATAAAATTTGAATTCGAGAGGTCTCCGGTCTACCCCTTTC  
GTGCTAAGCGATGAAAATGGCATTACAGTGGCGAAATCCATCAACAATGGCGAAGGGAATGACACCGAGTCTT  
GGTTCAAATGTATTGTTGATGTTCCGGATGGACAATCAGGGTTATTCTCTTGGAAAGCTGTTTACGAGGACCG  
CCAGCCGAATACTCTCGCCATACTACTTGACAATGAATTGGTTAAAAGCGAGATATATCGACCCTACGGGCGG  
AGTAAGCACCTGCACGGAAGCAGGTACGGAGAAATACGAAAAATTCAAATGGGTATCGGCAGACGCAAGCGG  
ACACTTGTGTCAGTACGACTACCGCCACCCCGCAGACGGAGAGTTGTTCTCTTGTGTCAAACCCACGTTGGACG  
AGTGCCGGACTGCACGTGACAAGTGGCTCACGGCGAAGGAAAGAAAGGAGGACAAGCGATGAACGCAAGTAATC  
TACCAAACGCTGATAGTGAAGTTCAGCGAGCCTATCAAAGTATTGGATAGCATCTTCGACGATGCGGAAGCGT  
GGGGAACGAGACAGCTGAAAGGGTGGATAGACACTACGAGGGAAGCAGGTTTACCGCCATTGACAGCCATAC  
GGCTGTAATCACAAGCGAGTACAACATGGAGTGTCTGAAAGCGTGGCTGGAAAGGCACACCCCATAAACGAG  
AAAGCAGAATTTTAAAGCGTGTGGCGGTGTACGCACCGCCAACATATAAACCCATAAAGACAGCGTATATGAT  
AGCGAAAACAATTTTGGAGCAGATAGGCGGCAGACGCTTTGCCGCCATGACTGGAAGCAAGGACTTCATAGAC

ATGGGCAACGGCTTACGCATGAGCCTTGCGAGGAACAAGACGAGCGCAAACCGCCTTGACATCATCTACGATG  
CAGGATTAGACCTCTACAATATGCGTTTCTACCGCAGGACGTTTCAGCAAAAAGACATTCGAGTGCAAGACGAA  
GGACATCGAAACGCACAAGGGGATATATTGCGATATGCTGGAAGAAATGTTACGATGGTAACGGGGCTTTAC  
ACCGATTTTGAGGG
