# Supplementary material for: Fecal DNA Virome Is Associated with the Development of Colorectal Neoplasia in a Murine Model of Colorectal Cancer
Source: Pathogens. 2022 Apr 11;11(4):457. doi: 10.3390/pathogens11040457 (PMC9025118; doi:10.3390/pathogens11040457)
Supplement: Supplementary file 1 [file pathogens-11-00457-s001.zip › Supplementary Data SI-S5.xlsx]

## Sheet: Supplementary Data 1 - Metadata
Sample ID	Origin	Sample	MouseID	Gender	Week	Treatment	Number of tumours	Weight (g)	Histology of the biopsies from endoscopically normal tissue	Histology of the biopsies from endoscopically tumor tissue	Average Tumour size	Tumor size	Tumor size2	Tumor size3	Tumor size4	Tumor size5	Tumor size6	Tumor size7	Tumor size8	Tumor size9	Tumor size10	Tumor size11	Tumor size12	Tumor size13	Tumor size14	Tumor size15	Tumor size16	Tumor size17
FA_1_1_0	Mouse	Stool	FA_1_1	F	0	AOM	0	21	normal	no biopsies taken	0
FA_1_3_0	Mouse	Stool	FA_1_3	F	0	AOM	0	17	lost in FFPE process	no biopsies taken	0
FA_1_4_0	Mouse	Stool	FA_1_4	F	0	AOM	0	18	lost in FFPE process	no biopsies taken	0
FA_1_5_0	Mouse	Stool	FA_1_5	F	0	AOM	0	18	lost in FFPE process	no biopsies taken	0
MA_1_1_0	Mouse	Stool	MA_1_1	M	0	AOM	0	24	lost in FFPE process	no biopsies taken	0
MA_1_2_0	Mouse	Stool	MA_1_2	M	0	AOM	0	26	lost in FFPE process	no biopsies taken	0
MA_1_4_0	Mouse	Stool	MA_1_4	M	0	AOM	0	23	normal	no biopsies taken	0
MA_1_5_0	Mouse	Stool	MA_1_5	M	0	AOM	0	23	lost in FFPE process	no biopsies taken	0
FP_1_1_0	Mouse	Stool	FP_1_1	F	0	PBS	0	21	lost in FFPE process	no biopsies taken	0
FP_1_2_0	Mouse	Stool	FP_1_2	F	0	PBS	0	20	lost in FFPE process	no biopsies taken	0
FP_1_4_0	Mouse	Stool	FP_1_4	F	0	PBS	0	20.5	lost in FFPE process	no biopsies taken	0
FP_1_5_0	Mouse	Stool	FP_1_5	F	0	PBS	0	19	lost in FFPE process	no biopsies taken	0
MP_1_1_0	Mouse	Stool	MP_1_1	M	0	PBS	0	23.5	lost in FFPE process	no biopsies taken	0
MP_1_2_0	Mouse	Stool	MP_1_2	M	0	PBS	0	26	lost in FFPE process	no biopsies taken	0
MP_1_3_0	Mouse	Stool	MP_1_3	M	0	PBS	0	23	lost in FFPE process	no biopsies taken	0
MP_1_5_0	Mouse	Stool	MP_1_5	M	0	PBS	0	24	lost in FFPE process	no biopsies taken	0
FA_1_1_10	Mouse	Stool	FA_1_1	F	10	AOM	0	22	normal	no biopsies taken	0
FA_1_3_10	Mouse	Stool	FA_1_3	F	10	AOM	0	19	lost in FFPE process	no biopsies taken	0
FA_1_4_10	Mouse	Stool	FA_1_4	F	10	AOM	0	21	normal	no biopsies taken	0
FA_1_5_10	Mouse	Stool	FA_1_5	F	10	AOM	0	19	normal	no biopsies taken	0
MA_1_1_10	Mouse	Stool	MA_1_1	M	10	AOM	0	24.5	lost in FFPE process	no biopsies taken	0
MA_1_2_10	Mouse	Stool	MA_1_2	M	10	AOM	0	25	normal	no biopsies taken	0
MA_1_4_10	Mouse	Stool	MA_1_4	M	10	AOM	0	23	normal	no biopsies taken	0
MA_1_5_10	Mouse	Stool	MA_1_5	M	10	AOM	0	21	lost in FFPE process	no biopsies taken	0
FP_1_1_10	Mouse	Stool	FP_1_1	F	10	PBS	0	24	normal	no biopsies taken	0
FP_1_2_10	Mouse	Stool	FP_1_2	F	10	PBS	0	22	normal	no biopsies taken	0
FP_1_4_10	Mouse	Stool	FP_1_4	F	10	PBS	0	23	lost in FFPE process	no biopsies taken	0
FP_1_5_10	Mouse	Stool	FP_1_5	F	10	PBS	0	19	normal	no biopsies taken	0
MP_1_1_10	Mouse	Stool	MP_1_1	M	10	PBS	0	23	normal	no biopsies taken	0
MP_1_2_10	Mouse	Stool	MP_1_2	M	10	PBS	0	27	lost in FFPE process	no biopsies taken	0
MP_1_3_10	Mouse	Stool	MP_1_3	M	10	PBS	0	22	lost in FFPE process	no biopsies taken	0
MP_1_5_10	Mouse	Stool	MP_1_5	M	10	PBS	0	27	normal	no biopsies taken	0
FA_1_1_12	Mouse	Stool	FA_1_1	F	12	AOM	0	22	lost in FFPE process	no biopsies taken	0
FA_1_3_12	Mouse	Stool	FA_1_3	F	12	AOM	2	19	lost in FFPE process	no biopsies taken	1	1	1
FA_1_4_12	Mouse	Stool	FA_1_4	F	12	AOM	1	20	lost in FFPE process	no biopsies taken	2	2
FA_1_5_12	Mouse	Stool	FA_1_5	F	12	AOM	3	18	lost in FFPE process	no biopsies taken	1	1	1	1
MA_1_1_12	Mouse	Stool	MA_1_1	M	12	AOM	1	24	lost in FFPE process	no biopsies taken	1	1
MA_1_2_12	Mouse	Stool	MA_1_2	M	12	AOM	1	26	lost in FFPE process	no biopsies taken	2	2
MA_1_4_12	Mouse	Stool	MA_1_4	M	12	AOM	5	23	lost in FFPE process	no biopsies taken	1	1	1	1	1	1
MA_1_5_12	Mouse	Stool	MA_1_5	M	12	AOM	4	23	lost in FFPE process	no biopsies taken	1.5	1	1	2	2
FP_1_1_12	Mouse	Stool	FP_1_1	F	12	PBS	0	24	normal	no biopsies taken	0
FP_1_2_12	Mouse	Stool	FP_1_2	F	12	PBS	1	22	lost in FFPE process	no biopsies taken	1	1
FP_1_4_12	Mouse	Stool	FP_1_4	F	12	PBS	1	23	normal	no biopsies taken	1.5	1.5
FP_1_5_12	Mouse	Stool	FP_1_5	F	12	PBS	0	20	lost in FFPE process	no biopsies taken	0
MP_1_1_12	Mouse	Stool	MP_1_1	M	12	PBS	0	22	normal	no biopsies taken	0
MP_1_2_12	Mouse	Stool	MP_1_2	M	12	PBS	0	26	lost in FFPE process	no biopsies taken	0
MP_1_3_12	Mouse	Stool	MP_1_3	M	12	PBS	0	24	normal	no biopsies taken	0
MP_1_5_12	Mouse	Stool	MP_1_5	M	12	PBS	0	26	normal	no biopsies taken	0
FA_1_1_14	Mouse	Stool	FA_1_1	F	14	AOM	0	23	normal	lost in FFPE process	0
FA_1_3_14	Mouse	Stool	FA_1_3	F	14	AOM	1	20	lost in FFPE process	lost in FFPE process	2	2
FA_1_4_14	Mouse	Stool	FA_1_4	F	14	AOM	1	21	lost in FFPE process	lost in FFPE process	1	1
FA_1_5_14	Mouse	Stool	FA_1_5	F	14	AOM	3	19	lost in FFPE process	conventional adenoma with low grade dysplasia CALGD	1.66667	2	1	2
MA_1_1_14	Mouse	Stool	MA_1_1	M	14	AOM	2	25	lost in FFPE process	lost in FFPE process	1	1	1
MA_1_2_14	Mouse	Stool	MA_1_2	M	14	AOM	1	27	lost in FFPE process	conventional adenoma with low grade dysplasia CALGD	2	2
MA_1_4_14	Mouse	Stool	MA_1_4	M	14	AOM	5	24	lost in FFPE process	lost in FFPE process	1	1	1	1	1	1
MA_1_5_14	Mouse	Stool	MA_1_5	M	14	AOM	7	23	normal	conventional adenoma with low grade dysplasia CALGD	1.07143	1	2.5	1	1	1	0.5	0.5
FP_1_1_14	Mouse	Stool	FP_1_1	F	14	PBS	0	25	lost in FFPE process	no biopsies taken	0
FP_1_2_14	Mouse	Stool	FP_1_2	F	14	PBS	0	24	lost in FFPE process	no biopsies taken	0
FP_1_4_14	Mouse	Stool	FP_1_4	F	14	PBS	1	25	lost in FFPE process	no biopsies taken	1.5	1.5
FP_1_5_14	Mouse	Stool	FP_1_5	F	14	PBS	0	21	normal	no biopsies taken	0
MP_1_1_14	Mouse	Stool	MP_1_1	M	14	PBS	0	24	normal	no biopsies taken	0
MP_1_2_14	Mouse	Stool	MP_1_2	M	14	PBS	0	28	lost in FFPE process	no biopsies taken	0
MP_1_3_14	Mouse	Stool	MP_1_3	M	14	PBS	0	24	normal	no biopsies taken	0
MP_1_5_14	Mouse	Stool	MP_1_5	M	14	PBS	0	27	normal	no biopsies taken	0
FA_1_1_20	Mouse	Stool	FA_1_1	F	20	AOM	4	22	normal	conventional adenoma with low grade dysplasia CALGD	1.5	2.5	1.5	1	1
FA_1_3_20	Mouse	Stool	FA_1_3	F	20	AOM	7	20	normal	conventional adenoma with low grade dysplasia CALGD	2.14286	2	3.5	3	2.5	2	1	1
FA_1_4_20	Mouse	Stool	FA_1_4	F	20	AOM	3	21	lost in FFPE process	lost in FFPE process	1.66667	2	2	1
FA_1_5_20	Mouse	Stool	FA_1_5	F	20	AOM	8	20	normal	lost in FFPE process	2.0625	2.5	2	2	2	2	2	2	2
MA_1_1_20	Mouse	Stool	MA_1_1	M	20	AOM	5	25	normal	conventional adenoma with low grade dysplasia CALGD	1.4	2	1	1	1	2
MA_1_2_20	Mouse	Stool	MA_1_2	M	20	AOM	4	27	normal	conventional adenoma with low grade dysplasia CALGD	2.125	2.5	2	2	2
MA_1_4_20	Mouse	Stool	MA_1_4	M	20	AOM	6	25	normal	conventional adenoma with low grade dysplasia CALGD	1.66667	2	2	2	2	1	1
MA_1_5_20	Mouse	Stool	MA_1_5	M	20	AOM	9	23	lost in FFPE process	lost in FFPE process	1.66667	2	2	1	2	1.5	1.5	2	2	1
FP_1_1_20	Mouse	Stool	FP_1_1	F	20	PBS	0	25	normal	no biopsies taken	0
FP_1_2_20	Mouse	Stool	FP_1_2	F	20	PBS	0	23	normal	no biopsies taken	0
FP_1_4_20	Mouse	Stool	FP_1_4	F	20	PBS	1	25	normal	no biopsies taken	1.5	1.5
FP_1_5_20	Mouse	Stool	FP_1_5	F	20	PBS	0	22	lost in FFPE process	no biopsies taken	0
MP_1_1_20	Mouse	Stool	MP_1_1	M	20	PBS	0	24	normal	no biopsies taken	0
MP_1_2_20	Mouse	Stool	MP_1_2	M	20	PBS	0	27	lost in FFPE process	no biopsies taken	0
MP_1_3_20	Mouse	Stool	MP_1_3	M	20	PBS	0	24	lost in FFPE process	no biopsies taken	0
MP_1_5_20	Mouse	Stool	MP_1_5	M	20	PBS	0	28	normal	no biopsies taken	0
FA_1_1_23	Mouse	Stool	FA_1_1	F	24	AOM	3	22	normal	conventional adenoma with high grade dysplasia CAHGD	3	3.5	3.5	2
FA_1_3_23	Mouse	Stool	FA_1_3	F	24	AOM	17	21	lost in FFPE process	conventional adenoma with low grade dysplasia CALGD	1.5	2	3.5	3	2.5	4	2.5	1	1	1	1	1	0.5	0.5	0.5	0.5	0.5	0.5
FA_1_4_23	Mouse	Stool	FA_1_4	F	24	AOM	5	22	normal	lost in FFPE process	1.2	2	1	1	1	1
FA_1_5_23	Mouse	Stool	FA_1_5	F	24	AOM	7	20	normal	conventional adenoma with high grade dysplasia CAHGD	2.21429	4	1	2	2	2	2	2.5
MA_1_1_23	Mouse	Stool	MA_1_1	M	24	AOM	3	26	normal	conventional adenoma with low grade dysplasia CALGD	1.66667	2	2	1
MA_1_2_23	Mouse	Stool	MA_1_2	M	24	AOM	7	28	normal	lost in FFPE process	1.64286	3	2	2	1.5	1	1	1
MA_1_4_23	Mouse	Stool	MA_1_4	M	24	AOM	7	25	normal	conventional adenoma with low grade dysplasia CALGD	1.28571	3	2	1	1	1	0.5	0.5
MA_1_5_23	Mouse	Stool	MA_1_5	M	24	AOM	8	23	normal	conventional adenoma with low grade dysplasia CALGD	1.5	1	2.5	2	2	1	0.5	2.5	0.5
FP_1_1_23	Mouse	Stool	FP_1_1	F	24	PBS	0	25	normal	no biopsies taken	0
FP_1_2_23	Mouse	Stool	FP_1_2	F	24	PBS	0	24	normal	no biopsies taken	0
FP_1_4_23	Mouse	Stool	FP_1_4	F	24	PBS	1	25	normal	lost in FFPE process	1.5	1.5
FP_1_5_23	Mouse	Stool	FP_1_5	F	24	PBS	0	22	normal	no biopsies taken	0
MP_1_1_23	Mouse	Stool	MP_1_1	M	24	PBS	0	26	normal	no biopsies taken	0
MP_1_2_23	Mouse	Stool	MP_1_2	M	24	PBS	0	29	normal	no biopsies taken	0
MP_1_3_23	Mouse	Stool	MP_1_3	M	24	PBS	0	25	normal	no biopsies taken	0
MP_1_5_23	Mouse	Stool	MP_1_5	M	24	PBS	0	27	normal	no biopsies taken	0

## Sheet: Supplementary data 2a
Group 1	Group 2	P value	Q value
AOM_0	AOM_10	1	1
AOM_0	AOM_12	0.328205	0.375092
AOM_0	AOM_14	0.293266	0.437607
AOM_0	AOM_20	0.573737	0.645377
AOM_0	AOM_24	0.798446	0.798446
AOM_0	PBS_0	0.798446	0.95913
AOM_0	PBS_10	0.720901	0.823887
AOM_0	PBS_12	0.645377	0.798446
AOM_0	PBS_14	0.234499	0.267999
AOM_0	PBS_20	0.0498834	0.0498834
AOM_0	PBS_24	0.328205	0.437607
AOM_10	AOM_12	0.0829837	0.132774
AOM_10	AOM_14	0.130381	0.208609
AOM_10	AOM_20	0.382284	0.436896
AOM_10	AOM_24	0.720901	0.823887
AOM_10	PBS_0	0.878477	0.95913
AOM_10	PBS_10	0.645377	0.737574
AOM_10	PBS_12	0.720901	0.798446
AOM_10	PBS_14	0.130381	0.149007
AOM_10	PBS_20	0.00325308	0.00520493
AOM_10	PBS_24	0.130381	0.214038
AOM_12	AOM_14	0.720901	0.720901
AOM_12	AOM_20	0.878477	0.95913
AOM_12	AOM_24	0.328205	0.437607
AOM_12	PBS_0	0.160528	0.222711
AOM_12	PBS_10	0.441803	0.706884
AOM_12	PBS_12	0.247648	0.283026
AOM_12	PBS_14	0.878477	0.95913
AOM_12	PBS_20	0.0206682	0.0413364
AOM_12	PBS_24	0.720901	0.823887
AOM_14	AOM_20	0.573737	0.764983
AOM_14	AOM_24	0.382284	0.509713
AOM_14	PBS_0	0.234499	0.312665
AOM_14	PBS_10	0.573737	0.6557
AOM_14	PBS_12	0.234499	0.468998
AOM_14	PBS_14	0.878477	0.95913
AOM_14	PBS_20	0.104895	0.11988
AOM_14	PBS_24	1	1
AOM_20	AOM_24	0.798446	0.95913
AOM_20	PBS_0	0.505361	0.505361
AOM_20	PBS_10	0.798446	0.95913
AOM_20	PBS_12	0.720901	0.823887
AOM_20	PBS_14	0.505361	0.577556
AOM_20	PBS_20	0.130381	0.149007
AOM_20	PBS_24	0.720901	0.720901
AOM_24	PBS_0	0.798446	0.91251
AOM_24	PBS_10	0.95913	0.95913
AOM_24	PBS_12	0.878477	0.95913
AOM_24	PBS_14	0.382284	0.382284
AOM_24	PBS_20	0.0498834	0.0997669
AOM_24	PBS_24	0.573737	0.860502
PBS_0	PBS_10	0.95913	1
PBS_0	PBS_12	0.878477	1
PBS_0	PBS_14	0.130381	0.149007
PBS_0	PBS_20	0.0010878	0.0021312
PBS_0	PBS_24	0.130381	0.173841
PBS_10	PBS_12	0.95913	0.95913
PBS_10	PBS_14	0.328205	0.375092
PBS_10	PBS_20	0.0829837	0.110645
PBS_10	PBS_24	0.441803	0.673815
PBS_12	PBS_14	0.234499	0.312665
PBS_12	PBS_20	0.00699301	0.00932401
PBS_12	PBS_24	0.382284	0.505361
PBS_14	PBS_20	0.441803	0.91251
PBS_14	PBS_24	0.645377	0.860502
PBS_20	PBS_24	0.278632	0.37151

## Sheet: Supplementary data 2b
Group 1	Group 2	P value	Q value
AOM_0	AOM_10	1	1
AOM_0	AOM_12	0.0281274	0.225019
AOM_0	AOM_14	0.194872	0.437607
AOM_0	AOM_20	0.160528	0.428076
AOM_0	AOM_24	0.441803	0.798446
AOM_0	PBS_0	0.95913	0.95913
AOM_0	PBS_10	0.573737	0.823887
AOM_0	PBS_12	0.505361	0.798446
AOM_0	PBS_14	0.0379176	0.173219
AOM_0	PBS_20	0.0104118	0.0498834
AOM_0	PBS_24	0.194872	0.437607
AOM_10	AOM_12	0.0206682	0.0826729
AOM_10	AOM_14	0.234499	0.312665
AOM_10	AOM_20	0.234499	0.436896
AOM_10	AOM_24	0.278632	0.823887
AOM_10	PBS_0	0.95913	0.95913
AOM_10	PBS_10	0.441803	0.737574
AOM_10	PBS_12	0.505361	0.798446
AOM_10	PBS_14	0.0206682	0.0826729
AOM_10	PBS_20	0.004662	0.00621601
AOM_10	PBS_24	0.160528	0.214038
AOM_12	AOM_14	0.104895	0.611655
AOM_12	AOM_20	0.234499	0.95913
AOM_12	AOM_24	0.278632	0.437607
AOM_12	PBS_0	0.0010878	0.00870241
AOM_12	PBS_10	0.441803	0.706884
AOM_12	PBS_12	0.0829837	0.283026
AOM_12	PBS_14	0.720901	0.95913
AOM_12	PBS_20	0.441803	0.504917
AOM_12	PBS_24	0.645377	0.823887
AOM_14	AOM_20	0.798446	0.798446
AOM_14	AOM_24	0.878477	0.878477
AOM_14	PBS_0	0.104895	0.312665
AOM_14	PBS_10	0.720901	0.720901
AOM_14	PBS_12	0.645377	0.737574
AOM_14	PBS_14	0.0829837	0.22129
AOM_14	PBS_20	0.0379176	0.101114
AOM_14	PBS_24	0.505361	1
AOM_20	AOM_24	0.95913	0.95913
AOM_20	PBS_0	0.104895	0.347682
AOM_20	PBS_10	0.720901	0.95913
AOM_20	PBS_12	0.505361	0.823887
AOM_20	PBS_14	0.194872	0.468998
AOM_20	PBS_20	0.0829837	0.149007
AOM_20	PBS_24	0.720901	0.720901
AOM_24	PBS_0	0.130381	0.347682
AOM_24	PBS_10	0.95913	0.95913
AOM_24	PBS_12	0.645377	0.95913
AOM_24	PBS_14	0.160528	0.321057
AOM_24	PBS_20	0.0649573	0.103932
AOM_24	PBS_24	0.645377	0.860502
PBS_0	PBS_10	0.382284	1
PBS_0	PBS_12	0.234499	1
PBS_0	PBS_14	0.0029526	0.018648
PBS_0	PBS_20	0.0001554	0.0012432
PBS_0	PBS_24	0.0829837	0.173841
PBS_10	PBS_12	0.798446	0.95913
PBS_10	PBS_14	0.278632	0.375092
PBS_10	PBS_20	0.0829837	0.110645
PBS_10	PBS_24	0.505361	0.673815
PBS_12	PBS_14	0.0498834	0.133023
PBS_12	PBS_20	0.014763	0.016872
PBS_12	PBS_24	0.328205	0.505361
PBS_14	PBS_20	0.95913	0.95913
PBS_14	PBS_24	0.441803	0.860502
PBS_20	PBS_24	0.194872	0.37151

## Sheet: Supplementary data 3
Pairs	P value	P.adjusted	Significance
AOM_0 vs AOM_10	0.002	0.132	ns
AOM_0 vs AOM_12	0.001	0.066	*
AOM_0 vs AOM_14	0.001	0.066	*
AOM_0 vs AOM_20	0.005	0.33	ns
AOM_0 vs AOM_24	0.001	0.066	*
AOM_0 vs PBS_0	0.672	1	ns
AOM_0 vs PBS_10	0.036	1	ns
AOM_0 vs PBS_12	0.002	0.132	ns
AOM_0 vs PBS_14	0.001	0.066	*
AOM_0 vs PBS_20	0.004	0.264	ns
AOM_0 vs PBS_24	0.001	0.066	*
AOM_10 vs AOM_12	0.002	0.132	ns
AOM_10 vs AOM_14	0.085	1	ns
AOM_10 vs AOM_20	0.076	1	ns
AOM_10 vs AOM_24	0.046	1	ns
AOM_10 vs PBS_0	0.007	0.462	ns
AOM_10 vs PBS_10	0.129	1	ns
AOM_10 vs PBS_12	0.003	0.198	ns
AOM_10 vs PBS_14	0.004	0.264	ns
AOM_10 vs PBS_20	0.027	1	ns
AOM_10 vs PBS_24	0.01	0.66	ns
AOM_12 vs AOM_14	0.015	0.99	ns
AOM_12 vs AOM_20	0.003	0.198	ns
AOM_12 vs AOM_24	0.004	0.264	ns
AOM_12 vs PBS_0	0.001	0.066	*
AOM_12 vs PBS_10	0.004	0.264	ns
AOM_12 vs PBS_12	0.058	1	ns
AOM_12 vs PBS_14	0.001	0.066	*
AOM_12 vs PBS_20	0.008	0.528	ns
AOM_12 vs PBS_24	0.001	0.066	*
AOM_14 vs AOM_20	0.134	1	ns
AOM_14 vs AOM_24	0.103	1	ns
AOM_14 vs PBS_0	0.002	0.132	ns
AOM_14 vs PBS_10	0.022	1	ns
AOM_14 vs PBS_12	0.037	1	ns
AOM_14 vs PBS_14	0.129	1	ns
AOM_14 vs PBS_20	0.268	1	ns
AOM_14 vs PBS_24	0.109	1	ns
AOM_20 vs AOM_24	0.655	1	ns
AOM_20 vs PBS_0	0.002	0.132	ns
AOM_20 vs PBS_10	0.044	1	ns
AOM_20 vs PBS_12	0.005	0.33	ns
AOM_20 vs PBS_14	0.019	1	ns
AOM_20 vs PBS_20	0.056	1	ns
AOM_20 vs PBS_24	0.025	1	ns
AOM_24 vs PBS_0	0.002	0.132	ns
AOM_24 vs PBS_10	0.037	1	ns
AOM_24 vs PBS_12	0.011	0.726	ns
AOM_24 vs PBS_14	0.034	1	ns
AOM_24 vs PBS_20	0.05	1	ns
AOM_24 vs PBS_24	0.058	1	ns
PBS_0 vs PBS_10	0.077	1	ns
PBS_0 vs PBS_12	0.004	0.264	ns
PBS_0 vs PBS_14	0.012	0.792	ns
PBS_0 vs PBS_20	0.01	0.66	ns
PBS_0 vs PBS_24	0.007	0.462	ns
PBS_10 vs PBS_12	0.01	0.66	ns
PBS_10 vs PBS_14	0.033	1	ns
PBS_10 vs PBS_20	0.071	1	ns
PBS_10 vs PBS_24	0.024	1	ns
PBS_12 vs PBS_14	0.647	1	ns
PBS_12 vs PBS_20	0.309	1	ns
PBS_12 vs PBS_24	0.499	1	ns
PBS_14 vs PBS_20	0.775	1	ns
PBS_14 vs PBS_24	0.807	1	ns
PBS_20 vs PBS_24	0.65	1	ns

## Sheet: Supplementary data 4
OVU	Association cohort	Week	LDA score	P value
OVU#208593	AOM	0	2.01031	0.0346985
OVU#283430	AOM	10	2.597	0.0208626
OVU#190239	AOM	10	2.3889	0.0204881
OVU#204166	AOM	10	2.35211	0.0229216
OVU#356451	AOM	10	2.34342	0.00426901
OVU#3132	AOM	10	2.31382	0.0428256
OVU#261731	AOM	10	2.29155	0.0491408
OVU#200524	AOM	10	2.23827	0.023742
OVU#33445	AOM	10	2.22124	0.0428256
OVU#25978	AOM	10	2.20449	0.00777396
OVU#66982	AOM	10	2.19045	0.0484522
OVU#208593	AOM	10	2.18401	0.0150873
OVU#211145	AOM	10	2.18262	0.0272785
OVU#111467	AOM	10	2.14017	0.0390997
OVU#19527	AOM	10	2.09809	0.0428256
OVU#108969	AOM	10	2.09779	0.0434661
OVU#127112	AOM	10	2.09471	0.00777396
OVU#310255	AOM	10	2.06611	0.00777396
OVU#153226	AOM	10	2.05619	0.0251815
OVU#268284	AOM	10	2.04835	0.00777396
OVU#139533	AOM	10	2.0478	0.0204273
OVU#377389	AOM	10	2.04096	0.0491408
OVU#155289	AOM	10	2.04058	0.0491408
OVU#193638	AOM	12	2.68061	0.0116842
OVU#87184	AOM	12	2.57724	0.014956
OVU#240886	AOM	12	2.38004	0.00505274
OVU#200524	AOM	12	2.3717	0.0032759
OVU#355414	AOM	12	2.35895	0.00850904
OVU#49292	AOM	12	2.30199	0.0208626
OVU#267128	AOM	12	2.25819	0.0434661
OVU#124011	AOM	12	2.25638	0.0351501
OVU#112862	AOM	12	2.25064	0.00612886
OVU#121722	AOM	12	2.05868	0.00457444
OVU#356451	AOM	14	2.39493	0.0152563
OVU#127926	AOM	14	2.3786	0.0106564
OVU#151597	AOM	14	2.31397	0.0204273
OVU#200524	AOM	14	2.21709	0.00632295
OVU#155289	AOM	14	2.20717	0.0106564
OVU#23245	AOM	14	2.20175	0.00359715
OVU#3132	AOM	14	2.10168	0.0272785
OVU#215953	AOM	20	2.68912	0.0155614
OVU#109308	AOM	20	2.66318	0.014956
OVU#151515	AOM	20	2.54817	0.000331066
OVU#283430	AOM	20	2.48583	0.0154091
OVU#106964	AOM	20	2.41807	0.0310325
OVU#49634	AOM	20	2.30781	0.0484522
OVU#303362	AOM	20	2.28805	0.00119374
OVU#212184	AOM	20	2.2803	0.0248608
OVU#50230	AOM	20	2.24185	0.0255795
OVU#139540	AOM	20	2.21331	0.0248608
OVU#229378	AOM	20	2.15091	0.00777396
OVU#15202	AOM	20	2.06228	0.0459994
OVU#97076	AOM	20	2.03879	0.0278905
OVU#162899	AOM	20	2.03532	0.0272785
OVU#65806	AOM	20	2.02708	0.0106564
OVU#123692	AOM	20	2.01667	0.0106564
OVU#208593	AOM	20	2.00875	0.0272785
OVU#116267	AOM	20	2.00388	0.0459994
OVU#215953	AOM	24	2.78346	0.00860255
OVU#153964	AOM	24	2.68213	0.0208626
OVU#205170	AOM	24	2.65772	0.00865154
OVU#139540	AOM	24	2.62332	0.00203625
OVU#371135	AOM	24	2.58789	0.0270655
OVU#264865	AOM	24	2.53128	0.0270655
OVU#220871	AOM	24	2.5263	0.0105152
OVU#151515	AOM	24	2.47119	0.0112746
OVU#283430	AOM	24	2.46486	0.0114731
OVU#227492	AOM	24	2.44945	0.0248608
OVU#264674	AOM	24	2.41631	0.00295178
OVU#159948	AOM	24	2.35477	0.0390997
OVU#207031	AOM	24	2.31607	0.0274232
OVU#190239	AOM	24	2.30931	0.0135903
OVU#24213	AOM	24	2.30503	0.0116027
OVU#200524	AOM	24	2.29752	0.0117187
OVU#303362	AOM	24	2.29185	0.00203625
OVU#295276	AOM	24	2.2634	0.00377634
OVU#18425	AOM	24	2.25411	0.0300874
OVU#209900	AOM	24	2.23445	0.0108964
OVU#11662	AOM	24	2.23038	0.0190165
OVU#267923	AOM	24	2.20759	0.0190165
OVU#65806	AOM	24	2.18019	0.00203625
OVU#122254	AOM	24	2.14082	0.00612886
OVU#39916	AOM	24	2.12162	0.0272785
OVU#58778	AOM	24	2.10635	0.0372501
OVU#63336	AOM	24	2.08248	0.0108964
OVU#163849	AOM	24	2.08207	0.0278905
OVU#53734	AOM	24	2.0611	0.0148811
OVU#272093	PBS	0	2.59676	0.0491408
OVU#79336	PBS	0	2.46527	0.0274232
OVU#236351	PBS	0	2.45796	0.0208626
OVU#175582	PBS	0	2.41953	0.0273095
OVU#209416	PBS	0	2.25864	0.0204273
OVU#269062	PBS	0	2.21972	0.00225356
OVU#210265	PBS	0	2.04158	0.0251815
OVU#171017	PBS	10	2.68319	0.00865154
OVU#148806	PBS	10	2.56186	0.0032759
OVU#175582	PBS	10	2.49869	0.0117187
OVU#79336	PBS	10	2.4851	0.0274232
OVU#127908	PBS	10	2.47361	0.00162919
OVU#236351	PBS	10	2.4214	0.00865154
OVU#126146	PBS	10	2.34579	0.0274232
OVU#199173	PBS	10	2.32614	0.0208626
OVU#183927	PBS	10	2.30073	0.0117187
OVU#12589	PBS	10	2.21846	0.0116571
OVU#119474	PBS	10	2.20206	0.0157143
OVU#86631	PBS	10	2.17274	0.0390997
OVU#75089	PBS	10	2.16696	0.0190165
OVU#50247	PBS	10	2.1212	0.0190165
OVU#364425	PBS	10	2.11446	0.0116571
OVU#125057	PBS	10	2.08933	0.0274232
OVU#210265	PBS	10	2.07693	0.0274232
OVU#336129	PBS	10	2.07396	0.0157143
OVU#235172	PBS	10	2.0586	0.0453607
OVU#388687	PBS	10	2.03777	0.0491408
OVU#8249	PBS	10	2.02982	0.0274232
OVU#272093	PBS	12	2.6397	0.0453607
OVU#79336	PBS	12	2.5207	0.0330063
OVU#127908	PBS	12	2.42665	0.0484522
OVU#175582	PBS	12	2.41623	0.0251815
OVU#204836	PBS	12	2.20153	0.0106564
OVU#271374	PBS	12	2.11498	0.0434661
OVU#336129	PBS	12	2.09218	0.028333
OVU#272093	PBS	14	3.05846	0.0355562
OVU#127140	PBS	14	2.92535	0.0356919
OVU#126146	PBS	14	2.58302	0.0453607
OVU#99458	PBS	14	2.42021	0.014214
OVU#119474	PBS	14	2.31779	0.0111092
OVU#289957	PBS	14	2.26397	0.0459994
OVU#232744	PBS	14	2.1341	0.0484522
OVU#271374	PBS	14	2.07353	0.0464609
OVU#131403	PBS	14	2.02185	0.0272785
OVU#145240	PBS	20	3.02791	0.00457444
OVU#254333	PBS	20	2.94331	0.0117187
OVU#99458	PBS	20	2.70474	0.0153332
OVU#232744	PBS	20	2.60756	0.00824417
OVU#239892	PBS	20	2.5634	0.0112746
OVU#158427	PBS	20	2.45635	0.0206376
OVU#161965	PBS	20	2.43335	0.0346985
OVU#288180	PBS	20	2.40075	0.0346985
OVU#126599	PBS	20	2.33516	0.0150873
OVU#39627	PBS	20	2.27092	0.0150873
OVU#58136	PBS	20	2.20053	0.0208626
OVU#139322	PBS	20	2.15841	0.014214
OVU#36659	PBS	24	2.69335	0.0274232
OVU#99458	PBS	24	2.49409	0.0300874
OVU#239892	PBS	24	2.4734	0.0273095
OVU#161965	PBS	24	2.45089	0.00777396
OVU#126599	PBS	24	2.25086	0.0262942
OVU#58136	PBS	24	2.1139	0.0208626
OVU#93413	PBS	24	2.07343	0.0459994
OVU#139322	PBS	24	2.04702	0.0356919
OVU#205330	PBS	24	2.02826	0.00454463

## Sheet: Supplementary data 5
OVU	Metadata	Correlation coefficient	Q value	Lowest classified taxa	Family	Genus
OVU#272093	week	0.332248	0.0125686	unclassified	unclassified	unclassified
OVU#166317	week	0.287167	0.0239127	unclassified	unclassified	unclassified
OVU#24213	week	0.271279	0.033486	genus	Myoviridae	Brunovirus
OVU#73531	week	0.215966	0.0429127	genus	Myoviridae	Brunovirus
OVU#200524	week	0.212885	3.8523e-06	unclassified	unclassified	unclassified
OVU#220871	week	0.191136	0.0179153	unclassified	unclassified	unclassified
OVU#215953	week	0.147867	0.0481124	unclassified	unclassified	unclassified
OVU#49292	week	0.091022	0.0252577	order (Caudovirales)	unclassified	unclassified
OVU#24213	tumour size	0.333564	0.00348914	genus	Myoviridae	Brunovirus
OVU#73531	tumour size	0.276919	0.00348914	genus	Myoviridae	Brunovirus
OVU#200524	tumour size	0.193691	0.000149541	unclassified	unclassified	unclassified
OVU#93789	tumour number	0.250624	0.0456389	unclassified	unclassified	unclassified

## Sheet: Supplementary data 7
Node	Node OVUs	Target	Target OVUs	Normalised LS	P value	Q value		Genus	List of OVUs
Bcepmuvirus		Hollowayvirus		0.478431	0.001	0.005938		Bcepmuvirus	OVU#193039 OVU#464603 OVU#174397 OVU#219706 OVU#223423 OVU#5638 OVU#36288 OVI#251086 OVU#32980 OVU#37145 OVU#25751 OVU#290091 OVU#115451 OVU#71451
Bcepmuvirus		Week		-0.194383	0.03	0.07125		Brunovirus	OVU#142391 OVU#56175 OVU#88317 OVU#162142 OVU#163849 OVU#125576 OVU#219761 OVU#69554 OVU#115338 OVU#24213 OVU#30850 OVU#150206 OVU#229784 OVU#92820 OVU#88085 OVU#66706 OVU#94129 OVU#73531
Brunovirus		tumor_size		0.539531	0	0		Erskinevirus	OVU#359974
Brunovirus		Week		0.483407	0.002	0.009268		Fromanvirus	OVU#205330
Brunovirus		No_of_tumors		0.412018	0.001	0.005938		Helsingorvirus	OVU#265903
Brunovirus		Saundersvirus		-0.406938	0.005	0.018269		Hollowayvirus	OVU#304592
Brunovirus		Mushuvirus		-0.46706	0	0		Hpunavirus	OVU#214222 OVU#14438
Brunovirus		Lagaffevirus		-0.488412	0.003	0.012128		Lagaffevirus	OVU#76006 OVU#74524 OVU#37915 OVU#158599 OVU#17155 OVU#129325 OVU#164082 OVU#17143 OVU#305979 OVU#205822 OVU#209636 OVU#86973 OVU#135206 OVU#265444 OVU#42258 OVU#208502 OVU#81205 OVU#46558 OVU#122652 OVU#168152 OVU#163284 OVU#206104 OVU#14155 OVU#256952 OVU#207696 OVU#308025 OVU#67312 OVU#209416 OVU#143329 OVU#378969 OVU#149927 OVU#121248 OVU#167711 OVU#287940 OVU#36405 OVU#224348 OVU#104477 OVU#…
Brunovirus		Unclassified		-0.51351	0.001	0.005938		Lambdavirus	OVU#37761 OVU#73593 OVU#12795 OVU#50852
Erskinevirus		Helsingorvirus		1	0.007	0.022931		Lilyvirus	OVU#208530 OVU#230568 OVU#295221 OVU#35626 OVU#360165 OVU#173075 OVU#99678 OVU#239718 OVU#197699 OVU#97853
Erskinevirus		Lilyvirus		0.977631	0.007	0.022931		Lubbockvirus	OVU#136480 OVU#95588 OVU#198098 OVU#298079 OVU#56147 OVU#86456 OVU#131050 OVU#118401 OVU#32630 OVU#162638 OVU#257232 OVU#27640 OVU#160398 OVU#192558 OVU#215879 OVU#254734 OVU#247952 OVU#29490 OVU#66213 OVU#20474 OVU#291273 OVU#120100 OVU#254341 OVU#304272 OVU#333016 OVU#57378 OVU#164074 OVU#48512 OVU#29840 OVU#348427 OVU#70784 OVU#160612 OVU#133333 OVU#180975 OVU#173543 OVU#200525 OVU#233339 OVU#…
Erskinevirus		Rimavirus		0.732039	0.03	0.07125		Mushuvirus	OVU#144327 OVU#164811 OVU#127546 OVU#133434 OVU#38802 OVU#67214 OVU#168456 OVU#211740 OVU#214281 OVU#120651 OVU#266420 OVU#37954 OVU#107361 OVU#211382 OVU#11457 OVU#312319 OVU#461472 OVU#63919 OVU#84555 OVU#179489 OVU#77366 OVU#213521 OVU#4745 OVU#162635 OVU#124211 OVU#41413 OVU#60982 OVU#148949 OVU#159635 OVU#183881 OVU#26796 OVU#25432 OVU#381029 OVU#27550 OVU#68219 OVU#10809 OVU#36471 OVU#87874…
Erskinevirus		Mushuvirus		0.443211	0.002	0.009268		Pepyhexavirus	OVU#303613
Fromanvirus		Week		-0.283779	0.023	0.058267		Prasinovirus	OVU#127041 OVU#158612 OVU#275971 OVU#142448
Fromanvirus		Unclassified		-0.41581	0	0		Rimavirus	OVU#439978 OVU#243638
Fromanvirus		Mushuvirus		-0.422266	0	0		Saundersvirus	OVU#11857
Fromanvirus		Lagaffevirus		-0.4706	0	0
Fromanvirus		Prasinovirus		-0.534394	0	0
Helsingorvirus		Lilyvirus		0.880932	0.002	0.009268
Helsingorvirus		Kafunavirus		0.49848	0.036	0.078621
Hollowayvirus		Kafunavirus		0.418354	0.02	0.052055
Hollowayvirus		Week		-0.309236	0.004	0.01551
Hpunavirus		Week		0.430799	0	0
Hpunavirus		tumor_size		0.27885	0.006	0.020727
Hpunavirus		No_of_tumors		0.275492	0.001	0.005938
Jilinvirus		Pepyhexavirus		0.510659	0.017	0.046812
Kafunavirus		Lilyvirus		0.63827	0.002	0.009268
Lagaffevirus		Unclassified		0.609863	0	0
Lagaffevirus		Mushuvirus		0.540082	0	0
Lagaffevirus		Prasinovirus		0.437319	0.002	0.009268
Lambdavirus		Peduovirus		0.847523	0	0
Lilyvirus		Prasinovirus		0.774801	0.005	0.018269
Lilyvirus		Pepyhexavirus		0.70179	0.004	0.01551
Lilyvirus		Mushuvirus		0.459901	0	0
Lubbockvirus		tumor_size		-0.147293	0.033	0.075542
Lubbockvirus		No_of_tumors		-0.175648	0.001	0.005938
Lubbockvirus		Week		-0.179182	0.036	0.078621
Mushuvirus		Unclassified		0.482636	0	0
Mushuvirus		Prasinovirus		0.451891	0.003	0.012128
No_of_tumors		tumor_size		0.340351	0	0
Prasinovirus		Unclassified		0.402754	0.006	0.020727
Week		No_of_tumors		0.457036	0	0
Week		tumor_size		0.448958	0	0
